# Supplementary material for: Radiotherapy for brain metastasis and long-term survival
Source: PubMed Central journal article supplement (PMC8044241; doi:10.1038/s41598-021-87357-x), 2021-04-13
Supplement: 41598_2021_87357_MOESM1_ESM.pdf [file 41598_2021_87357_MOESM1_ESM.pdf]

# SUPPLEMENTAL MATERIAL

Scientific Reports

## Radiotherapy for brain metastasis and long-term survival

**Kawngwoo Park** <sup>1</sup>✦, **Gi Hwan Bae** <sup>2,7</sup>✦, **Woo Kyung Kim** <sup>1</sup>, **Chan-Jong Yoo** <sup>1</sup>, **Cheol Wan Park** <sup>3</sup>, **Soo-Ki Kim** <sup>4</sup>, **Jihye Cha** <sup>5</sup>, **Jin Wook Kim** <sup>6</sup>, **Jaehun Jung** <sup>2,7,\*</sup>

<sup>1</sup>Department of Neurosurgery Gachon University Gil Medical Center, Incheon, 21565, Republic of Korea

<sup>2</sup>Department of Preventive Medicine, Gachon University College of Medicine, Incheon, 21565, Republic of Korea

<sup>3</sup>Department of Emergency Medicine, Gachon University Gil Medical Center, Incheon, 21565, Republic of Korea

<sup>4</sup>Department of Microbiology, Wonju College of Medicine, Yonsei University, Wonju, 26426, Republic of Korea

<sup>5</sup>Department of Radiation Oncology, Wonju College of Medicine, Yonsei University, Wonju, 26426, Republic of Korea

<sup>6</sup>Department of Neurosurgery, Seoul National University College of Medicine, Seoul, 03080, Republic of Korea

<sup>7</sup>Gil Artificial Intelligence & Bigdata Convergence Center, Gachon University Gil Medical Center, Incheon, 21565 Republic of Korea

✦ Contributed equally and should be considered co-first authors.

\* Correspondence: [eastside1st@gmail.com](mailto:eastside1st@gmail.com); Tel.: +82-10-6359-3201

**Supplemental Table 1. International Classification of Diseases 10th Revision (ICD-10) mapping for Charlson Comorbidity Index.<sup>1</sup>**

| <b>Diseases</b>                            | <b>ICD-10 codes</b>                                                                                      | <b>Weight</b> |
|--------------------------------------------|----------------------------------------------------------------------------------------------------------|---------------|
| Myocardial infarction                      | I21, I22, I252                                                                                           | 1             |
| Congestive heart failure                   | I43, I50, I099, I110, I130, I132, I255, I420, I425, I426, I427, I428, I429, P290                         | 1             |
| Peripheral vascular disease                | I70, I71, I731, I738, I739, I771, I790, I792, K551, K558, K559, Z958, Z959                               | 1             |
| Cerebrovascular disease                    | G45, G46, I60 ~ I69, H340                                                                                | 1             |
| Dementia                                   | F00 ~ F03, G30, F051, G311                                                                               | 1             |
| Chronic Obstructive Pulmonary Disease      | J40 ~ J47, J60 ~ J67, I278, I279, J684, J701, J703                                                       | 1             |
| Connective Tissue Disease                  | M05, M32 ~ M34, M06, M315, M351, M353, M360                                                              | 1             |
| Peptic Ulcer Disease                       | K25 ~ K28                                                                                                | 1             |
| Mild Liver Disease                         | B18, K73, K74, K700, K701 ~ K703, K709, K717, K713, K714, K715, K760, K762 ~ K764, K768, K769, Z944      | 1             |
| Diabetes without complications             | E100, E101, E106, E108 ~ E111, E116, E118 ~ E121, E126, E128 ~ E131, E136, E138 ~ E141, E146, E148, E149 | 1             |
| Diabetes with complications                | E102 ~ E105, E107, E112 ~ E115, E117, E122 ~ E125, E127, E132 ~ E135, E137, E142 ~ E145, E147            | 2             |
| Paraplegia and Hemiplegia                  | G81, G82, G041, G114, G801, G802, G830 ~ G834, G839                                                      | 2             |
| Renal Disease                              | N18, N19, N052 ~ N057, N250, I120, I131, N032 ~ N037, Z490, Z491, Z492, Z940, Z992                       | 2             |
| Cancer                                     | C00 ~ C26, C30 ~ C34, C37 ~ C41, C43, C45 ~ C58, C60 ~ C76, C81 ~ C85, C88, C90 ~ C97                    | 2             |
| Moderate or Severe Liver Disease           | K704, K711, K721, K729, K765, K766, K767, I850, I859, I864, I982                                         | 3             |
| Metastatic Carcinoma                       | C77 ~ C80                                                                                                | 6             |
| Acquired immune deficiency syndrome (AIDS) | B20 ~ B22, B24                                                                                           | 6             |

Note that all variables showed statistically significant differences at a p-value of 1%. In addition, all variables except sex differed in the probabilistic approach using a Bayesian factor.  
SD, standard deviation; CCI, Charlson Comorbidity Index.

**Supplemental Table 2. Chemotherapy codes registered with National healthcare insurance service system**

| <b>Main code</b> | <b>Product code</b> | <b>ATC code</b> | <b>ATC code name</b>        |
|------------------|---------------------|-----------------|-----------------------------|
| 364100AGN        | 645400880           | L01BC53         | tegafur, combinations       |
| 388501ACH        | 652600810           | L01XX           | Other antineoplastic agents |
| 388502ACH        | 652600820           | L01XX           | Other antineoplastic agents |
| 412701ATB        | 645403950           | L01XE01         | imatinib                    |
| 412701ATB        | 643506550           | L01XE01         | imatinib                    |
| 412701ATB        | 647803790           | L01XE01         | imatinib                    |
| 412701ATB        | 640006540           | L01XE01         | imatinib                    |
| 412701ATB        | 644913540           | L01XE01         | imatinib                    |
| 412701ATB        | 641906020           | L01XE01         | imatinib                    |
| 412701ATB        | 642506940           | L01XE01         | imatinib                    |
| 412701ATB        | 653600010           | L01XE01         | imatinib                    |
| 412701ATB        | 643306580           | L01XE01         | imatinib                    |
| 412701ATB        | 646802550           | L01XE01         | imatinib                    |
| 412702ATB        | 641906040           | L01XE01         | imatinib                    |
| 412702ATB        | 642506920           | L01XE01         | imatinib                    |
| 412703ATB        | 645403960           | L01XE01         | imatinib                    |
| 412703ATB        | 643506530           | L01XE01         | imatinib                    |
| 412703ATB        | 640006530           | L01XE01         | imatinib                    |
| 412703ATB        | 647803780           | L01XE01         | imatinib                    |
| 412703ATB        | 642506930           | L01XE01         | imatinib                    |
| 412703ATB        | 643306560           | L01XE01         | imatinib                    |
| 412703ATB        | 641906030           | L01XE01         | imatinib                    |
| 412703ATB        | 646802560           | L01XE01         | imatinib                    |
| 412703ATB        | 644913550           | L01XE01         | imatinib                    |
| 412704ATB        | 643506920           | L01XE01         | imatinib                    |
| 452400ACH        | 649807210           | L01BC53         | tegafur, combinations       |
| 452400ACH        | 645401930           | L01BC53         | tegafur, combinations       |
| 452500ACH        | 649807220           | L01BC53         | tegafur, combinations       |
| 452500ACH        | 645401940           | L01BC53         | tegafur, combinations       |
| 453001ATB        | 648507340           | L01XE02         | gefitinib                   |
| 453001ATB        | 641805910           | L01XE02         | gefitinib                   |
| 453001ATB        | 642905710           | L01XE02         | gefitinib                   |

|           |           |         |             |
|-----------|-----------|---------|-------------|
| 453001ATB | 643306980 | L01XE02 | gefitinib   |
| 453001ATB | 643507210 | L01XE02 | gefitinib   |
| 453001ATB | 650700460 | L01XE02 | gefitinib   |
| 477401ATB | 626900760 | L01XE03 | erlotinib   |
| 477401ATB | 640006640 | L01XE03 | erlotinib   |
| 477401ATB | 642905700 | L01XE03 | erlotinib   |
| 477401ATB | 641805870 | L01XE03 | erlotinib   |
| 477401ATB | 643507230 | L01XE03 | erlotinib   |
| 477401ATB | 643306650 | L01XE03 | erlotinib   |
| 477401ATB | 641906190 | L01XE03 | erlotinib   |
| 477401ATB | 645000480 | L01XE03 | erlotinib   |
| 477402ATB | 626900770 | L01XE03 | erlotinib   |
| 477402ATB | 640006630 | L01XE03 | erlotinib   |
| 477402ATB | 641805880 | L01XE03 | erlotinib   |
| 477402ATB | 642905290 | L01XE03 | erlotinib   |
| 477402ATB | 643306660 | L01XE03 | erlotinib   |
| 477402ATB | 644308530 | L01XE03 | erlotinib   |
| 477402ATB | 645000490 | L01XE03 | erlotinib   |
| 477403ATB | 626900750 | L01XE03 | erlotinib   |
| 477403ATB | 645000500 | L01XE03 | erlotinib   |
| 485605ATB | 653601520 | L01XE10 | everolimus  |
| 485606ATB | 653601530 | L01XE10 | everolimus  |
| 485607ATB | 653602230 | L01XE10 | everolimus  |
| 485701ACH | 052900070 | L04AX02 | thalidomide |
| 485701ACH | 670701660 | L04AX02 | thalidomide |
| 485701ACH | 626100130 | L04AX02 | thalidomide |
| 485701ACH | 691800010 | L04AX02 | thalidomide |
| 485701ACH | 652603550 | L04AX02 | thalidomide |
| 485702ACH | 052900060 | L04AX02 | thalidomide |
| 485702ACH | 626100120 | L04AX02 | thalidomide |
| 487701ACH | 648900470 | L01XE04 | sunitinib   |
| 487702ACH | 648900480 | L01XE04 | sunitinib   |
| 487703ACH | 648900490 | L01XE04 | sunitinib   |
| 488001ATB | 641104700 | L01XE05 | sorafenib   |
| 493301ATB | 658700210 | L01XE06 | dasatinib   |

|           |           |         |              |
|-----------|-----------|---------|--------------|
| 493302ATB | 658700220 | L01XE06 | dasatinib    |
| 493303ATB | 658700230 | L01XE06 | dasatinib    |
| 493304ATB | 658700510 | L01XE06 | dasatinib    |
| 493305ATB | 658700680 | L01XE06 | dasatinib    |
| 507501ATB | 653602840 | L01XE07 | lapatinib    |
| 562601ACH | 653601100 | L01XE08 | nilotinib    |
| 562602ACH | 653602160 | L01XE08 | nilotinib    |
| 588201ACH | 643307750 | L04AX04 | lenalidomide |
| 588201ACH | 641806390 | L04AX04 | lenalidomide |
| 588201ACH | 691800050 | L04AX04 | lenalidomide |
| 588201ATB | 622701000 | L04AX04 | lenalidomide |
| 588202ACH | 643307770 | L04AX04 | lenalidomide |
| 588202ACH | 641806410 | L04AX04 | lenalidomide |
| 588202ACH | 691800060 | L04AX04 | lenalidomide |
| 588202ATB | 622701010 | L04AX04 | lenalidomide |
| 588203ACH | 643307780 | L04AX04 | lenalidomide |
| 588203ACH | 641806400 | L04AX04 | lenalidomide |
| 588203ACH | 691800070 | L04AX04 | lenalidomide |
| 588203ATB | 622701030 | L04AX04 | lenalidomide |
| 588204ACH | 643307800 | L04AX04 | lenalidomide |
| 588204ACH | 641806380 | L04AX04 | lenalidomide |
| 588204ACH | 691800040 | L04AX04 | lenalidomide |
| 588204ATB | 622700980 | L04AX04 | lenalidomide |
| 588205ACH | 643307810 | L04AX04 | lenalidomide |
| 588205ACH | 641806360 | L04AX04 | lenalidomide |
| 588205ACH | 691800160 | L04AX04 | lenalidomide |
| 588205ATB | 622700970 | L04AX04 | lenalidomide |
| 588206ACH | 643307790 | L04AX04 | lenalidomide |
| 588206ACH | 641806370 | L04AX04 | lenalidomide |
| 588206ACH | 691800150 | L04AX04 | lenalidomide |
| 588206ATB | 622700990 | L04AX04 | lenalidomide |
| 588207ACH | 643307760 | L04AX04 | lenalidomide |
| 588207ACH | 641806420 | L04AX04 | lenalidomide |
| 588207ACH | 691800140 | L04AX04 | lenalidomide |
| 588207ATB | 622701020 | L04AX04 | lenalidomide |

|           |           |         |                           |
|-----------|-----------|---------|---------------------------|
| 611801ATB | 653602870 | L01XE11 | pazopanib                 |
| 611802ATB | 653602810 | L01XE11 | pazopanib                 |
| 617501ACH | 648902080 | L01XE16 | crizotinib                |
| 617502ACH | 648902070 | L01XE16 | crizotinib                |
| 617701ACH | 641704390 | L01XE   | Protein kinase inhibitors |
| 617702ACH | 641704380 | L01XE   | Protein kinase inhibitors |
| 620402ATB | 646902200 | L02BX03 | abiraterone               |
| 620501ATB | 645001290 | L01XE15 | vemurafenib               |
| 621001ATB | 648902130 | L01XE17 | axitinib                  |
| 621002ATB | 648902120 | L01XE17 | axitinib                  |
| 623001ATB | 653602400 | L01XE18 | ruxolitinib               |
| 623002ATB | 653602390 | L01XE18 | ruxolitinib               |
| 623003ATB | 653602380 | L01XE18 | ruxolitinib               |
| 624101ATB | 693400200 | L01XE12 | vandetanib                |
| 624102ATB | 693400210 | L01XE12 | vandetanib                |
| 624801ATB | 641105790 | L01XE21 | regorafenib               |
| 626101ATB | 653501430 | L01XE13 | afatinib                  |
| 626102ATB | 653501440 | L01XE13 | afatinib                  |
| 626103ATB | 653501450 | L01XE13 | afatinib                  |
| 627401ACS | 677200230 | L02BB   | Anti-androgens            |
| 628001ACH | 691800130 | L04AX06 | pomalidomide              |
| 628002ACH | 691800120 | L04AX06 | pomalidomide              |
| 628003ACH | 691800110 | L04AX06 | pomalidomide              |
| 628004ACH | 691800100 | L04AX06 | pomalidomide              |
| 628101ACH | 646902020 | L01XE27 | ibrutinib                 |
| 634401ACH | 653602530 | L01XE28 | ceritinib                 |
| 643501ACH | 650700970 | L01XX46 | olaparib                  |
| 645201ACH | 621100150 | L01XE29 | lenvatinib                |
| 645202ACH | 621100140 | L01XE29 | lenvatinib                |
| 645401ATB | 653602690 | L01XE25 | trametinib                |
| 645402ATB | 653602680 | L01XE25 | trametinib                |
| 652401ATB | 643507570 | L01XE40 | olmutinib                 |
| 652402ATB | 643507580 | L01XE40 | olmutinib                 |
| 652501ATB | 650700990 | L01XE35 | osimertinib               |
| 652502ATB | 650700980 | L01XE35 | osimertinib               |

|           |           |         |                        |
|-----------|-----------|---------|------------------------|
| 655201ACH | 648902930 | L01XE33 | palbociclib            |
| 655202ACH | 648902940 | L01XE33 | palbociclib            |
| 655203ACH | 648902920 | L01XE33 | palbociclib            |
| 656201ACH | 645001430 | L01XE36 | alectinib              |
| 663101ACH | 653602650 | L01XE23 | dabrafenib             |
| 663102ACH | 653602660 | L01XE23 | dabrafenib             |
| 669601ATB | 649900450 | L01XE24 | ponatinib              |
| 669602ATB | 649900460 | L01XE24 | ponatinib              |
| 238430ASY | 652604621 | L03AX   | Other immunostimulants |
| 238431ASY | 652604624 | L03AX   | Other immunostimulants |
| 243001ACS | 694800050 | L01XX14 | tretinoin              |
| 629001BIJ | 052300041 | M05BX04 | denosumab              |
| 629002BIJ | 052300061 | M05BX04 | denosumab              |
| 104501BIJ | 653601261 | L03AC01 | aldesleukin            |
| 120630BIJ | 649900341 | L01AB01 | busulfan               |
| 123730BIJ | 641900161 | L01XA02 | carboplatin            |
| 123730BIJ | 642501121 | L01XA02 | carboplatin            |
| 123730BIJ | 648903234 | L01XA02 | carboplatin            |
| 123730BIJ | 644303881 | L01XA02 | carboplatin            |
| 123731BIJ | 641900151 | L01XA02 | carboplatin            |
| 123731BIJ | 648903231 | L01XA02 | carboplatin            |
| 123731BIJ | 642501131 | L01XA02 | carboplatin            |
| 123731BIJ | 644303891 | L01XA02 | carboplatin            |
| 123732BIJ | 648903232 | L01XA02 | carboplatin            |
| 123732BIJ | 641900141 | L01XA02 | carboplatin            |
| 123732BIJ | 642501141 | L01XA02 | carboplatin            |
| 123732BIJ | 644303901 | L01XA02 | carboplatin            |
| 123733BIJ | 641904421 | L01XA02 | carboplatin            |
| 123734BIJ | 648903233 | L01XA02 | carboplatin            |
| 123735BIJ | 641904431 | L01XA02 | carboplatin            |
| 134530BIJ | 642502351 | L01XA01 | cisplatin              |
| 134530BIJ | 644302861 | L01XA01 | cisplatin              |
| 134530BIJ | 642905381 | L01XA01 | cisplatin              |
| 134533BIJ | 642905391 | L01XA01 | cisplatin              |
| 134533BIJ | 642502371 | L01XA01 | cisplatin              |



|           |           |         |                  |
|-----------|-----------|---------|------------------|
| 134534BIJ | 644302871 | L01XA01 | cisplatin        |
| 134830BIJ | 646900251 | L01BB04 | cladribine       |
| 139005BIJ | 642201671 | L01AA01 | cyclophosphamide |
| 139601BIJ | 648900501 | L01BC01 | cytarabine       |
| 139602BIJ | 648900511 | L01BC01 | cytarabine       |
| 139633BIJ | 648903281 | L01BC01 | cytarabine       |
| 139637BIJ | 648903291 | L01BC01 | cytarabine       |
| 139631BIJ | 648903311 | L01BC01 | cytarabine       |
| 139632BIJ | 644902935 | L01BC01 | cytarabine       |
| 139634BIJ | 644913681 | L01BC01 | cytarabine       |
| 139635BIJ | 644913691 | L01BC01 | cytarabine       |
| 139636BIJ | 644913701 | L01BC01 | cytarabine       |
| 139638BIJ | 644914101 | L01BC01 | cytarabine       |
| 139901BIJ | 644300661 | L01AX04 | dacarbazine      |
| 139902BIJ | 644300671 | L01AX04 | dacarbazine      |
| 148341BIJ | 622700311 | L01CD02 | docetaxel        |
| 148342BIJ | 622700321 | L01CD02 | docetaxel        |
| 148340BIJ | 641905871 | L01CD02 | docetaxel        |
| 148344BIJ | 641905841 | L01CD02 | docetaxel        |
| 148344BIJ | 642506171 | L01CD02 | docetaxel        |
| 148344BIJ | 643306431 | L01CD02 | docetaxel        |
| 148344BIJ | 652000861 | L01CD02 | docetaxel        |
| 148344BIJ | 649806881 | L01CD02 | docetaxel        |
| 148348BIJ | 641905851 | L01CD02 | docetaxel        |
| 148348BIJ | 642506181 | L01CD02 | docetaxel        |
| 148348BIJ | 643306441 | L01CD02 | docetaxel        |
| 148348BIJ | 652000871 | L01CD02 | docetaxel        |
| 148348BIJ | 649806891 | L01CD02 | docetaxel        |
| 148349BIJ | 642103821 | L01CD02 | docetaxel        |
| 148346BIJ | 648506301 | L01CD02 | docetaxel        |
| 148346BIJ | 642903781 | L01CD02 | docetaxel        |
| 148346BIJ | 645403351 | L01CD02 | docetaxel        |
| 148346BIJ | 643505511 | L01CD02 | docetaxel        |
| 148346BIJ | 641804771 | L01CD02 | docetaxel        |
| 148350BIJ | 642903791 | L01CD02 | docetaxel        |

|           |           |         |                      |
|-----------|-----------|---------|----------------------|
| 148350BIJ | 648506311 | L01CD02 | docetaxel            |
| 148350BIJ | 643505521 | L01CD02 | docetaxel            |
| 148350BIJ | 645403361 | L01CD02 | docetaxel            |
| 148350BIJ | 641804781 | L01CD02 | docetaxel            |
| 148351BIJ | 645403551 | L01CD02 | docetaxel            |
| 151901BIJ | 658600771 | L01BC   | Pyrimidine analogues |
| 157131BIJ | 641903341 | L01CB01 | etoposide            |
| 157131BIJ | 626900331 | L01CB01 | etoposide            |
| 157131BIJ | 642505141 | L01CB01 | etoposide            |
| 157132BIJ | 641903351 | L01CB01 | etoposide            |
| 160101BIJ | 648903141 | L01BB05 | fludarabine          |
| 160101BIJ | 659700941 | L01BB05 | fludarabine          |
| 160101BIJ | 693400041 | L01BB05 | fludarabine          |
| 161430BIJ | 644902301 | L01BC02 | fluorouracil         |
| 161431BIJ | 644902311 | L01BC02 | fluorouracil         |
| 161432BIJ | 644902321 | L01BC02 | fluorouracil         |
| 164930BIJ | 658600031 | L01BC05 | gemcitabine          |
| 164930BIJ | 670800261 | L01BC05 | gemcitabine          |
| 164930BIJ | 648503051 | L01BC05 | gemcitabine          |
| 164930BIJ | 642503081 | L01BC05 | gemcitabine          |
| 164930BIJ | 642102171 | L01BC05 | gemcitabine          |
| 164930BIJ | 647802091 | L01BC05 | gemcitabine          |
| 164930BIJ | 643302541 | L01BC05 | gemcitabine          |
| 164930BIJ | 643500101 | L01BC05 | gemcitabine          |
| 164930BIJ | 643307191 | L01BC05 | gemcitabine          |
| 164930BIJ | 648903302 | L01BC05 | gemcitabine          |
| 164931BIJ | 658600041 | L01BC05 | gemcitabine          |
| 164931BIJ | 648503041 | L01BC05 | gemcitabine          |
| 164931BIJ | 670800271 | L01BC05 | gemcitabine          |
| 164931BIJ | 642102161 | L01BC05 | gemcitabine          |
| 164931BIJ | 642505041 | L01BC05 | gemcitabine          |
| 164931BIJ | 647802081 | L01BC05 | gemcitabine          |
| 164931BIJ | 643302551 | L01BC05 | gemcitabine          |
| 164931BIJ | 643500091 | L01BC05 | gemcitabine          |
| 164931BIJ | 643307181 | L01BC05 | gemcitabine          |

|           |           |         |                    |
|-----------|-----------|---------|--------------------|
| 164931BIJ | 648903301 | L01BC05 | gemcitabine        |
| 164932BIJ | 644303581 | L01BC05 | gemcitabine        |
| 164932BIJ | 648903303 | L01BC05 | gemcitabine        |
| 167201BIJ | 650700491 | L02AE03 | goserelin          |
| 167202BIJ | 650700481 | L02AE03 | goserelin          |
| 173301BIJ | 642202521 | L01AA06 | ifosfamide         |
| 175530BIJ | 645000151 | L03AB04 | interferon alfa-2a |
| 175630BIJ | 655501271 | L03AB05 | interferon alfa-2b |
| 175631BIJ | 655501261 | L03AB05 | interferon alfa-2b |
| 177430BIJ | 650901741 | L01XX19 | irinotecan         |
| 177430BIJ | 641901621 | L01XX19 | irinotecan         |
| 177430BIJ | 645402321 | L01XX19 | irinotecan         |
| 177430BIJ | 641802561 | L01XX19 | irinotecan         |
| 177430BIJ | 648503461 | L01XX19 | irinotecan         |
| 177430BIJ | 642102211 | L01XX19 | irinotecan         |
| 177430BIJ | 640003402 | L01XX19 | irinotecan         |
| 177430BIJ | 643502131 | L01XX19 | irinotecan         |
| 177430BIJ | 670500711 | L01XX19 | irinotecan         |
| 177430BIJ | 648903261 | L01XX19 | irinotecan         |
| 177431BIJ | 650901751 | L01XX19 | irinotecan         |
| 177431BIJ | 641901631 | L01XX19 | irinotecan         |
| 177431BIJ | 645402331 | L01XX19 | irinotecan         |
| 177431BIJ | 648503471 | L01XX19 | irinotecan         |
| 177431BIJ | 642102221 | L01XX19 | irinotecan         |
| 177431BIJ | 641802571 | L01XX19 | irinotecan         |
| 177431BIJ | 640003412 | L01XX19 | irinotecan         |
| 177431BIJ | 643502141 | L01XX19 | irinotecan         |
| 177431BIJ | 670500721 | L01XX19 | irinotecan         |
| 177431BIJ | 648903271 | L01XX19 | irinotecan         |
| 177433BIJ | 645402521 | L01XX19 | irinotecan         |
| 177433BIJ | 648503481 | L01XX19 | irinotecan         |
| 177433BIJ | 642102231 | L01XX19 | irinotecan         |
| 177433BIJ | 641802591 | L01XX19 | irinotecan         |
| 177435BIJ | 645402531 | L01XX19 | irinotecan         |
| 177435BIJ | 648503491 | L01XX19 | irinotecan         |

|           |           |         |              |
|-----------|-----------|---------|--------------|
| 177435BIJ | 642102241 | L01XX19 | irinotecan   |
| 181401BIJ | 666300241 | L01XX02 | asparaginase |
| 182602BIJ | 641601191 | L02AE02 | leuprorelin  |
| 182602BIJ | 641601192 | L02AE02 | leuprorelin  |
| 182602BIJ | 653400451 | L02AE02 | leuprorelin  |
| 182602BIJ | 696300391 | L02AE02 | leuprorelin  |
| 182602BIJ | 696300381 | L02AE02 | leuprorelin  |
| 182602BIJ | 624900021 | L02AE02 | leuprorelin  |
| 182604BIJ | 696300401 | L02AE02 | leuprorelin  |
| 182605BIJ | 655601441 | L02AE02 | leuprorelin  |
| 182606BIJ | 655601451 | L02AE02 | leuprorelin  |
| 182608BIJ | 655601471 | L02AE02 | leuprorelin  |
| 182610BIJ | 624900091 | L02AE02 | leuprorelin  |
| 182611BIJ | 696300481 | L02AE02 | leuprorelin  |
| 182630BIJ | 653400461 | L02AE02 | leuprorelin  |
| 189902BIJ | 643903051 | L01AA03 | melphalan    |
| 192142BIJ | 648902971 | L01BA01 | methotrexate |
| 192143BIJ | 648902991 | L01BA01 | methotrexate |
| 192139BIJ | 648903011 | L01BA01 | methotrexate |
| 192139BIJ | 642101491 | L01BA01 | methotrexate |
| 192139BIJ | 644305914 | L01BA01 | methotrexate |
| 192139BIJ | 644901641 | L01BA01 | methotrexate |
| 192141BIJ | 648903013 | L01BA01 | methotrexate |
| 192141BIJ | 644901631 | L01BA01 | methotrexate |
| 192141BIJ | 642101501 | L01BA01 | methotrexate |
| 196530BIJ | 658600411 | L01DB07 | mitoxantrone |
| 198001BIJ | 664000261 | L01AC01 | thiotepa     |
| 198003BIJ | 664000271 | L01AC01 | thiotepa     |
| 205803BIJ | 645402431 | L01XA03 | oxaliplatin  |
| 205803BIJ | 641904461 | L01XA03 | oxaliplatin  |
| 205803BIJ | 648504561 | L01XA03 | oxaliplatin  |
| 205830BIJ | 693500311 | L01XA03 | oxaliplatin  |
| 205830BIJ | 645402411 | L01XA03 | oxaliplatin  |
| 205830BIJ | 641903081 | L01XA03 | oxaliplatin  |
| 205830BIJ | 652000371 | L01XA03 | oxaliplatin  |

|           |           |         |             |
|-----------|-----------|---------|-------------|
| 205830BIJ | 677100161 | L01XA03 | oxaliplatin |
| 205830BIJ | 642102941 | L01XA03 | oxaliplatin |
| 205830BIJ | 641802441 | L01XA03 | oxaliplatin |
| 205830BIJ | 643307351 | L01XA03 | oxaliplatin |
| 205830BIJ | 658602481 | L01XA03 | oxaliplatin |
| 205830BIJ | 643300972 | L01XA03 | oxaliplatin |
| 205830BIJ | 643504131 | L01XA03 | oxaliplatin |
| 205830BIJ | 622700371 | L01XA03 | oxaliplatin |
| 205830BIJ | 648502811 | L01XA03 | oxaliplatin |
| 205830BIJ | 648903171 | L01XA03 | oxaliplatin |
| 205832BIJ | 648504571 | L01XA03 | oxaliplatin |
| 205832BIJ | 648903173 | L01XA03 | oxaliplatin |
| 205834BIJ | 693500321 | L01XA03 | oxaliplatin |
| 205834BIJ | 645402421 | L01XA03 | oxaliplatin |
| 205834BIJ | 641803771 | L01XA03 | oxaliplatin |
| 205834BIJ | 641903091 | L01XA03 | oxaliplatin |
| 205834BIJ | 648502821 | L01XA03 | oxaliplatin |
| 205834BIJ | 622700381 | L01XA03 | oxaliplatin |
| 205834BIJ | 652000381 | L01XA03 | oxaliplatin |
| 205834BIJ | 642102951 | L01XA03 | oxaliplatin |
| 205834BIJ | 658602491 | L01XA03 | oxaliplatin |
| 205834BIJ | 643307361 | L01XA03 | oxaliplatin |
| 205834BIJ | 643300942 | L01XA03 | oxaliplatin |
| 205834BIJ | 643504321 | L01XA03 | oxaliplatin |
| 205834BIJ | 648903172 | L01XA03 | oxaliplatin |
| 207830BIJ | 668100741 | L01CD01 | paclitaxel  |
| 207830BIJ | 648902961 | L01CD01 | paclitaxel  |
| 207830BIJ | 643503191 | L01CD01 | paclitaxel  |
| 207830BIJ | 644900461 | L01CD01 | paclitaxel  |
| 207830BIJ | 658700311 | L01CD01 | paclitaxel  |
| 207830BIJ | 622700051 | L01CD01 | paclitaxel  |
| 207830BIJ | 622700111 | L01CD01 | paclitaxel  |
| 207830BIJ | 648503851 | L01CD01 | paclitaxel  |
| 207831BIJ | 668100751 | L01CD01 | paclitaxel  |
| 207831BIJ | 643503201 | L01CD01 | paclitaxel  |

|           |           |         |                             |
|-----------|-----------|---------|-----------------------------|
| 207831BIJ | 648503861 | L01CD01 | paclitaxel                  |
| 207831BIJ | 644302891 | L01CD01 | paclitaxel                  |
| 207831BIJ | 622700061 | L01CD01 | paclitaxel                  |
| 207831BIJ | 622700121 | L01CD01 | paclitaxel                  |
| 207831BIJ | 644900471 | L01CD01 | paclitaxel                  |
| 207831BIJ | 648902962 | L01CD01 | paclitaxel                  |
| 207832BIJ | 648902963 | L01CD01 | paclitaxel                  |
| 207832BIJ | 643503211 | L01CD01 | paclitaxel                  |
| 207832BIJ | 644302901 | L01CD01 | paclitaxel                  |
| 207833BIJ | 648503871 | L01CD01 | paclitaxel                  |
| 207835BIJ | 648902964 | L01CD01 | paclitaxel                  |
| 207835BIJ | 648503881 | L01CD01 | paclitaxel                  |
| 211130BIJ | 684200161 | L03AX   | Other immunostimulants      |
| 228130BIJ | 659900551 | L01XX   | Other antineoplastic agents |
| 241901BIJ | 644308261 | L01XX17 | topotecan                   |
| 241901BIJ | 653602791 | L01XX17 | topotecan                   |
| 242801BIJ | 623800041 | L01XC03 | trastuzumab                 |
| 242802BIJ | 051500031 | L01XC03 | trastuzumab                 |
| 242802BIJ | 623800031 | L01XC03 | trastuzumab                 |
| 242802BIJ | 645000611 | L01XC03 | trastuzumab                 |
| 242830BIJ | 645001361 | L01XC03 | trastuzumab                 |
| 244902BIJ | 652500021 | L02AE04 | triptorelin                 |
| 244902BIJ | 681400031 | L02AE04 | triptorelin                 |
| 244930BIJ | 652500031 | L02AE04 | triptorelin                 |
| 247830BIJ | 626900041 | L01CA01 | vinblastine                 |
| 247830BIJ | 644301321 | L01CA01 | vinblastine                 |
| 248030BIJ | 648902981 | L01CA02 | vincristine                 |
| 248030BIJ | 658600481 | L01CA02 | vincristine                 |
| 248031BIJ | 648903111 | L01CA02 | vincristine                 |
| 248230BIJ | 642200051 | L01CA04 | vinorelbine                 |
| 248230BIJ | 648903241 | L01CA04 | vinorelbine                 |
| 248231BIJ | 642200071 | L01CA04 | vinorelbine                 |
| 248231BIJ | 648903251 | L01CA04 | vinorelbine                 |
| 422603BIJ | 645001381 | L01XC02 | rituximab                   |
| 422632BIJ | 645001421 | L01XC02 | rituximab                   |

|           |           |         |                             |
|-----------|-----------|---------|-----------------------------|
| 422630BIJ | 623800061 | L01XC02 | rituximab                   |
| 422630BIJ | 645000221 | L01XC02 | rituximab                   |
| 422631BIJ | 623800051 | L01XC02 | rituximab                   |
| 422631BIJ | 645000231 | L01XC02 | rituximab                   |
| 452801BIJ | 643303471 | L01XX   | Other antineoplastic agents |
| 463301BIJ | 052500011 | L01XX32 | bortezomib                  |
| 463301BIJ | 643306901 | L01XX32 | bortezomib                  |
| 463301BIJ | 652606391 | L01XX32 | bortezomib                  |
| 463301BIJ | 641906311 | L01XX32 | bortezomib                  |
| 463301BIJ | 622700891 | L01XX32 | bortezomib                  |
| 463301BIJ | 646900441 | L01XX32 | bortezomib                  |
| 463302BIJ | 622700961 | L01XX32 | bortezomib                  |
| 463302BIJ | 641906331 | L01XX32 | bortezomib                  |
| 463302BIJ | 644309151 | L01XX32 | bortezomib                  |
| 463303BIJ | 652606381 | L01XX32 | bortezomib                  |
| 467501BIJ | 681400041 | L02AE04 | triptorelin                 |
| 467502BIJ | 681400141 | L02AE04 | triptorelin                 |
| 481203BIJ | 643306881 | L01BA04 | pemetrexed                  |
| 481203BIJ | 642506881 | L01BA04 | pemetrexed                  |
| 481203BIJ | 643507291 | L01BA04 | pemetrexed                  |
| 481203BIJ | 642905401 | L01BA04 | pemetrexed                  |
| 481203BIJ | 641805851 | L01BA04 | pemetrexed                  |
| 481230BIJ | 642904461 | L01BA04 | pemetrexed                  |
| 481230BIJ | 642507191 | L01BA04 | pemetrexed                  |
| 481230BIJ | 640006881 | L01BA04 | pemetrexed                  |
| 481230BIJ | 670800951 | L01BA04 | pemetrexed                  |
| 481230BIJ | 670500801 | L01BA04 | pemetrexed                  |
| 481230BIJ | 641805321 | L01BA04 | pemetrexed                  |
| 481230BIJ | 648903121 | L01BA04 | pemetrexed                  |
| 481231BIJ | 670500791 | L01BA04 | pemetrexed                  |
| 481231BIJ | 642904471 | L01BA04 | pemetrexed                  |
| 481231BIJ | 642506871 | L01BA04 | pemetrexed                  |
| 481231BIJ | 643307261 | L01BA04 | pemetrexed                  |
| 481231BIJ | 643306351 | L01BA04 | pemetrexed                  |
| 481231BIJ | 640006911 | L01BA04 | pemetrexed                  |

|           |           |         |                     |
|-----------|-----------|---------|---------------------|
| 481231BIJ | 670800141 | L01BA04 | pemetrexed          |
| 481231BIJ | 644913901 | L01BA04 | pemetrexed          |
| 481231BIJ | 641805311 | L01BA04 | pemetrexed          |
| 481231BIJ | 643507251 | L01BA04 | pemetrexed          |
| 481231BIJ | 648903151 | L01BA04 | pemetrexed          |
| 481232BIJ | 622700711 | L01BA04 | pemetrexed          |
| 481232BIJ | 648903131 | L01BA04 | pemetrexed          |
| 481235BIJ | 670500811 | L01BA04 | pemetrexed          |
| 481235BIJ | 643307271 | L01BA04 | pemetrexed          |
| 481233BIJ | 642507241 | L01BA04 | pemetrexed          |
| 481234BIJ | 642507251 | L01BA04 | pemetrexed          |
| 481239BIJ | 642507491 | L01BA04 | pemetrexed          |
| 484301BIJ | 622701071 | L01BC07 | azacitidine         |
| 484301BIJ | 641906761 | L01BC07 | azacitidine         |
| 484301BIJ | 691800031 | L01BC07 | azacitidine         |
| 484302BIJ | 622701041 | L01BC07 | azacitidine         |
| 495601BIJ | 641906741 | L01BC08 | decitabine          |
| 495601BIJ | 646901301 | L01BC08 | decitabine          |
| 495602BIJ | 622701061 | L01BC08 | decitabine          |
| 503701BIJ | 691800091 | L01CD01 | paclitaxel          |
| 554330BIJ | 645000361 | L01XC07 | bevacizumab         |
| 554331BIJ | 645000671 | L01XC07 | bevacizumab         |
| 556430BIJ | 661700551 | L01XC06 | cetuximab           |
| 568230BIJ | 648902371 | L01XE09 | temsirolimus        |
| 588430BIJ | 052900081 | L01XX27 | arsenic trioxide    |
| 588430BIJ | 679700231 | L01XX27 | arsenic trioxide    |
| 613901BIJ | 652000901 | L01CD04 | cabazitaxel         |
| 614330BIJ | 693400061 | L01BB06 | clofarabine         |
| 614601BIJ | 621100011 | L01AA09 | bendamustine        |
| 614602BIJ | 621100021 | L01AA09 | bendamustine        |
| 621330BIJ | 621100031 | L01XX41 | eribulin            |
| 624401BIJ | 652500341 | L02BX02 | degarelix           |
| 624402BIJ | 652500352 | L02BX02 | degarelix           |
| 624501BIJ | 696300191 | L01XC12 | brentuximab vedotin |
| 624601BIJ | 645001321 | L01XC13 | pertuzumab          |



|           |           |         |                       |
|-----------|-----------|---------|-----------------------|
| 626001BIJ | 645001331 | L01XC14 | trastuzumab emtansine |
| 626002BIJ | 645001341 | L01XC14 | trastuzumab emtansine |
| 628901BIJ | 645001371 | L01XC15 | obinutuzumab          |
| 638401BIJ | 050400011 | L01XC17 | nivolumab             |
| 638402BIJ | 050400021 | L01XC17 | nivolumab             |
| 639001BIJ | 655501901 | L01XC18 | pembrolizumab         |
| 639301BIJ | 670801011 | L01XC21 | ramucirumab           |
| 639302BIJ | 670801021 | L01XC21 | ramucirumab           |
| 647701BIJ | 052300031 | L01XC19 | blinatumomab          |
| 647801BIJ | 052300081 | L01XX45 | carfilzomib           |
| 647802BIJ | 052300071 | L01XX45 | carfilzomib           |
| 647901BIJ | 646902081 | L04AC11 | siltuximab            |
| 647902BIJ | 646902091 | L04AC11 | siltuximab            |
| 657701BIJ | 645001441 | L01XC   | Monoclonal antibodies |
| 658801BIJ | 652000931 | L01XX44 | aflibercept           |
| 658802BIJ | 652000941 | L01XX44 | aflibercept           |
| 658901BIJ | 670801091 | L01XC27 | olaratumab            |
| 114301BIJ | 655501211 | L03AX03 | BCG vaccine           |

---

**Supplemental Table 3. Cox regression of RT before/after PSM for patients with brain metastases (RT patients with more than 5 fractions RT)**

|                         | Non-RT               |              | RT                   |              | Adjusted for age and sex |               |         | Adjusted for age, sex and CCI |             |         |
|-------------------------|----------------------|--------------|----------------------|--------------|--------------------------|---------------|---------|-------------------------------|-------------|---------|
|                         | All-cause mortality  | Person-Years | All-cause mortality  | Person-Years | HR                       | 95%CI         | p-value | HR                            | 95%CI       | p-value |
|                         | 24483/28630 (85.50%) | 44930.71     | 25503/28630 (89.10%) | 44906.44     | 0.962                    | 0.945-0.979   | <.0001  | 0.961                         | 0.945-0.978 | <.0001  |
| Sex                     |                      |              |                      |              |                          |               |         |                               |             |         |
| Male                    | 15393/17236 (89.31%) | 21259.84     | 15202/16559 (91.81%) | 21104.85     | 0.919                    | 0.899-0.94    | <.0001  | 0.919                         | 0.898-0.94  | <.0001  |
| Female                  | 9090/11394 (79.78%)  | 23670.87     | 10301/12071 (85.34%) | 23801.59     | 1.033                    | 1.004-1.062   | 0.0252  | 1.026                         | 0.997-1.055 | 0.0767  |
| Age                     |                      |              |                      |              |                          |               |         |                               |             |         |
| 20~29                   | 79/122 (64.75%)      | 363.41       | 110/140 (78.57%)     | 315.28       | 1.279                    | 0.956-1.712   | 0.0975  | 1.205                         | 0.899-1.615 | 0.2131  |
| 30~39                   | 598/835 (71.62%)     | 2174.5       | 860/1032 (83.33%)    | 2222.88      | 1.172                    | 1.055-1.301   | 0.0031  | 1.122                         | 1.01-1.246  | 0.0322  |
| 40~49                   | 2373/3104 (76.45%)   | 7141.72      | 2927/3529 (82.94%)   | 7438.34      | 1.025                    | 0.971-1.082   | 0.3686  | 1.001                         | 0.948-1.057 | 0.9619  |
| 50~59                   | 5798/7147 (81.12%)   | 12859.23     | 6551/7589 (86.32%)   | 13220.63     | 0.972                    | 0.938-1.007   | 0.118   | 0.968                         | 0.934-1.003 | 0.0723  |
| 60~69                   | 8450/9650 (87.56%)   | 13737.78     | 8633/9461 (91.25%)   | 13616.16     | 0.942                    | 0.914-0.971   | <.0001  | 0.942                         | 0.914-0.971 | <.0001  |
| 70~79                   | 7185/7772 (92.45%)   | 8654.08      | 6422/6879 (93.36%)   | 8093.15      | 0.917                    | 0.887-0.949   | <.0001  | 0.913                         | 0.883-0.945 | <.0001  |
| Medical aid beneficiary | 1563/1857 (84.17%)   | 2897.77      | 1630/1854 (87.92%)   | 2729.71      | -                        | -             | -       | -                             | -           | -       |
| Medial facility         |                      |              |                      |              |                          |               |         |                               |             |         |
| Senior general hospital | 9284/11133 (83.39%)  | 18758.78     | 10797/12173 (88.7%)  | 18643.92     | 1.01                     | 0.982-1.039   | 0.4746  | 1.007                         | 0.98-1.036  | 0.6104  |
| Tertiary hospital       | 2294/2608 (87.96%)   | 4106.26      | 2267/2498 (90.75%)   | 3904.18      | 0.95                     | 0.897-1.008   | 0.0881  | 0.951                         | 0.897-1.009 | 0.0948  |
| Secondary hospital      | 12904/14887 (86.68%) | 22063.14     | 12434/13954 (89.11%) | 22354.92     | 0.924                    | 0.901-0.947   | <.0001  | 0.924                         | 0.902-0.947 | <.0001  |
| Local clinic            | 1/2 (50%)            | 2.53         | 5/5 (100%)           | 3.43         | 3.945                    | 0.033-477.555 | 0.5749  | -                             | -           | -       |
| Primary cancer          |                      |              |                      |              |                          |               |         |                               |             |         |
| Head and neck           | 518/675 (76.74%)     | 1589.21      | 585/682 (85.78%)     | 1582.39      | 1.121                    | 0.996-1.262   | 0.0588  | 1.13                          | 1.004-1.272 | 0.0434  |
| Esophagus               | 388/432 (89.81%)     | 559.73       | 402/438 (91.78%)     | 448.38       | 1.054                    | 0.916-1.213   | 0.4627  | 1.068                         | 0.928-1.229 | 0.3615  |
| Stomach                 | 803/970 (82.78%)     | 1899.93      | 957/1064 (89.94%)    | 1525.3       | 1.113                    | 1.012-1.224   | 0.0271  | 1.113                         | 1.012-1.224 | 0.0271  |
| Colorectal              | 2277/2875 (79.2%)    | 6198.84      | 2783/3108 (89.54%)   | 4715.75      | 1.291                    | 1.221-1.365   | <.0001  | 1.29                          | 1.22-1.364  | <.0001  |
| Liver                   | 1577/1783 (88.45%)   | 2159.44      | 1678/1805 (92.96%)   | 1746.16      | 1.095                    | 1.021-1.173   | 0.0104  | 1.085                         | 1.012-1.162 | 0.0216  |
| Hepatobiliary           | 298/317 (94.01%)     | 330.2        | 289/306 (94.44%)     | 287.35       | 0.968                    | 0.823-1.139   | 0.6961  | 0.96                          | 0.816-1.129 | 0.6212  |
| Pancreas                | 429/494 (86.84%)     | 770.09       | 464/534 (86.89%)     | 813.56       | 0.943                    | 0.827-1.076   | 0.3857  | 0.945                         | 0.828-1.078 | 0.3979  |

|                 |                      |          |                      |          |       |             |        |       |             |        |
|-----------------|----------------------|----------|----------------------|----------|-------|-------------|--------|-------|-------------|--------|
| Pharynx         | 137/180 (76.11%)     | 521.08   | 165/194 (85.05%)     | 522      | 1.125 | 0.895-1.414 | 0.3124 | 1.137 | 0.904-1.43  | 0.2712 |
| Lung            | 16719/18481 (90.47%) | 21455.52 | 16284/17760 (91.69%) | 24698.77 | 0.836 | 0.818-0.854 | <.0001 | 0.836 | 0.818-0.854 | <.0001 |
| Breast          | 2328/3248 (71.67%)   | 9217.08  | 3019/3898 (77.45%)   | 9947.52  | 1.092 | 1.034-1.153 | 0.0015 | 1.061 | 1.005-1.121 | 0.0324 |
| Cervix          | 213/298 (71.48%)     | 887.41   | 367/422 (86.97%)     | 756.98   | 1.491 | 1.257-1.767 | <.0001 | 1.485 | 1.253-1.761 | <.0001 |
| Uterine         | 100/139 (71.94%)     | 386.19   | 153/186 (82.26%)     | 315.9    | 1.278 | 0.989-1.651 | 0.0607 | 1.281 | 0.991-1.655 | 0.0584 |
| Ovary           | 306/394 (77.66%)     | 983.46   | 343/421 (81.47%)     | 889.27   | 1.08  | 0.926-1.261 | 0.3278 | 1.067 | 1.029-1.108 | 0.0005 |
| Prostate        | 858/1036 (82.82%)    | 1893.63  | 846/951 (88.96%)     | 1476.72  | 1.156 | 1.051-1.272 | 0.0028 | 1.161 | 1.055-1.277 | 0.0023 |
| Scrotum         | 20/33 (60.61%)       | 85.65    | 23/32 (71.88%)       | 68.21    | 1.229 | 0.672-2.25  | 0.5033 | 1.137 | 0.611-2.117 | 0.6858 |
| Kidney          | 568/696 (81.61%)     | 1195.04  | 668/768 (86.98%)     | 1151.73  | 1.048 | 0.936-1.174 | 0.4122 | 1.047 | 0.935-1.173 | 0.4228 |
| Bladder         | 248/310 (80%)        | 501.94   | 268/300 (89.33%)     | 395.94   | 1.161 | 0.976-1.381 | 0.092  | 1.141 | 0.958-1.357 | 0.1388 |
| Thyroid         | 302/582 (51.89%)     | 2219.27  | 536/660 (81.21%)     | 1536.87  | 1.921 | 1.664-2.217 | <.0001 | 1.929 | 1.67-2.227  | <.0001 |
| Operation       | 879/1091 (80.57%)    | 1839.1   | 1377/1641 (83.91%)   | 3576.72  | 0.838 | 0.77-0.913  | <.0001 | 0.829 | 0.761-0.903 | <.0001 |
| Chemotherapy    | 12187/13731 (88.76%) | 19494.12 | 13254/14798 (89.57%) | 24270.85 | 0.879 | 0.857-0.901 | <.0001 | 0.879 | 0.858-0.901 | <.0001 |
| Diagnostic year |                      |          |                      |          |       |             |        |       |             |        |
| 2005            | 1554/1732 (89.72%)   | 3855.27  | 1423/1564 (90.98%)   | 3529.7   | 0.954 | 0.887-1.025 | 0.1976 | 0.954 | 0.887-1.025 | 0.1976 |
| 2006            | 1701/2007 (84.75%)   | 5283.44  | 1728/1901 (90.9%)    | 4084.13  | 1.074 | 1.004-1.148 | 0.0379 | 1.073 | 1.004-1.148 | 0.0387 |
| 2007            | 1736/2146 (80.89%)   | 5925.68  | 1808/2043 (88.5%)    | 4738.1   | 1.11  | 1.039-1.186 | 0.002  | 1.106 | 1.035-1.181 | 0.0029 |
| 2008            | 1944/2197 (88.48%)   | 4154.91  | 1871/2045 (91.49%)   | 3856.64  | 0.951 | 0.893-1.014 | 0.1251 | 0.952 | 0.893-1.014 | 0.1276 |
| 2009            | 2066/2323 (88.94%)   | 3826.37  | 2074/2289 (90.61%)   | 4326.28  | 0.888 | 0.835-0.944 | 0.0001 | 0.89  | 0.837-0.946 | 0.0002 |
| 2010            | 2231/2532 (88.11%)   | 3974.66  | 2220/2436 (91.13%)   | 4141.45  | 0.902 | 0.851-0.957 | 0.0006 | 0.903 | 0.851-0.958 | 0.0007 |
| 2011            | 2173/2453 (88.59%)   | 3549.94  | 2339/2587 (90.41%)   | 4260.85  | 0.878 | 0.827-0.931 | <.0001 | 0.878 | 0.828-0.931 | <.0001 |
| 2012            | 2167/2474 (87.59%)   | 3252.36  | 2264/2461 (92.00%)   | 3345.68  | 0.938 | 0.884-0.995 | 0.0332 | 0.938 | 0.884-0.995 | 0.0333 |
| 2013            | 2260/2656 (85.09%)   | 3288.67  | 2379/2616 (90.94%)   | 3283.75  | 1.007 | 0.951-1.067 | 0.8124 | 1.007 | 0.95-1.067  | 0.8188 |
| 2014            | 2183/2573 (84.84%)   | 2890.7   | 2536/2871 (88.33%)   | 3511.67  | 0.961 | 0.907-1.018 | 0.1717 | 0.96  | 0.907-1.017 | 0.1652 |
| 2015            | 2235/2683 (83.3%)    | 2584.4   | 2407/2810 (85.66%)   | 3097.91  | 0.91  | 0.859-0.964 | 0.0014 | 0.91  | 0.859-0.964 | 0.0014 |
| 2016            | 2233/2854 (78.24%)   | 2344.3   | 2454/3007 (81.61%)   | 2730.27  | 0.953 | 0.9-1.009   | 0.1005 | 0.954 | 0.9-1.01    | 0.1052 |

Abbreviations : Non-RT: Non-radio therapy, RT: radio therapy, PSM: propensity score matching, CCI: Charlson Comorbidity Index, HR: Hazard ratio,

**Supplemental Table 4. Cox regression of RT before/after PSM for patients with brain metastases (RT patients with at least one fraction RT)**

|                         | Non-RT               |              | RT (≥1)              |              | Adjusted for age, sex and psm p-value <0.05 variable |           |         | Non-RT               |              | RT (1 – 4 fractions) |              | Adjusted for age, sex and psm p-value <0.05 variable |           |         | Non-RT               |              | RT (≥5 fractions)    |              | Adjusted for age, sex and psm p-value <0.05 variable |           |         |
|-------------------------|----------------------|--------------|----------------------|--------------|------------------------------------------------------|-----------|---------|----------------------|--------------|----------------------|--------------|------------------------------------------------------|-----------|---------|----------------------|--------------|----------------------|--------------|------------------------------------------------------|-----------|---------|
|                         | All-cause mortality  | Person-Years | All-cause mortality  | Person-Years | HR                                                   | 95%CI     | p-value | All-cause mortality  | Person-Years | All-cause mortality  | Person-Years | HR                                                   | 95%CI     | p-value | All-cause mortality  | Person-Years | All-cause mortality  | Person-Years | HR                                                   | 95%CI     | p-value |
|                         | 20664/26175 (78.95%) | 48413.51     | 23636/26175 (90.3%)  | 27908.6      | 1.335                                                | 1.31-1.36 | <.0001  | 18012/22907 (78.63%) | 42842.02     | 20763/22907 (90.64%) | 23399.11     | 1.399                                                | 1.37-1.43 | <.0001  | 12488/16182 (77.17%) | 30352.61     | 14222/16182 (87.89%) | 21566.21     | 1.457                                                | 1.37-1.48 | <.0001  |
| Sex                     |                      |              |                      |              |                                                      |           |         |                      |              |                      |              |                                                      |           |         |                      |              |                      |              |                                                      |           |         |
| Male                    | 13670/16229 (84.23%) | 23744.87     | 14973/16229 (92.26%) | 14603.99     | 1.231                                                | 1.2-1.26  | <.0001  | 11941/14199 (84.1%)  | 20853.92     | 13219/14199 (93.1%)  | 11754.55     | 1.315                                                | 1.28-1.35 | <.0001  | 8195/9847 (83.22%)   | 14022.88     | 8858/9847 (89.96%)   | 11268.01     | 1.095                                                | 1.06-1.13 | <.0001  |
| Female                  | 6994/9946 (70.32%)   | 24668.64     | 8663/9946 (87.1%)    | 13304.62     | 1.541                                                | 1.49-1.59 | <.0001  | 6071/8708 (69.72%)   | 21988.1      | 7544/8708 (86.63%)   | 11644.56     | 1.556                                                | 1.5-1.61  | <.0001  | 4293/6335 (67.77%)   | 16329.73     | 5364/6335 (84.67%)   | 10298.2      | 1.434                                                | 1.38-1.49 | <.0001  |
| Age                     |                      |              |                      |              |                                                      |           |         |                      |              |                      |              |                                                      |           |         |                      |              |                      |              |                                                      |           |         |
| 20–29                   | 53/94 (56.38%)       | 339.09       | 77/94 (81.91%)       | 175.87       | 2.153                                                | 1.46-3.18 | 0.0001  | 41/70 (58.57%)       | 218.52       | 60/70 (85.71%)       | 88.39        | 1.785                                                | 1.1-2.9   | 0.0191  | 23/37 (62.16%)       | 86.31        | 33/37 (89.19%)       | 43.18        | 1.443                                                | 0.74-2.82 | 0.2823  |
| 30–39                   | 350/611 (57.28%)     | 2113.27      | 506/611 (82.82%)     | 1023.12      | 1.91                                                 | 1.66-2.2  | <.0001  | 307/522 (58.81%)     | 1722.38      | 440/522 (84.29%)     | 767.76       | 1.866                                                | 1.6-2.17  | <.0001  | 245/428 (57.24%)     | 1413.68      | 351/428 (82.01%)     | 790.25       | 1.692                                                | 1.43-2    | <.0001  |
| 40–49                   | 1408/2223 (63.34%)   | 6875.23      | 1914/2223 (86.1%)    | 3281.69      | 1.825                                                | 1.7-1.96  | <.0001  | 1303/2026 (64.31%)   | 6001.44      | 1738/2026 (85.78%)   | 2985.21      | 1.71                                                 | 1.59-1.84 | <.0001  | 1083/1682 (64.39%)   | 4785.57      | 1394/1682 (82.88%)   | 3000.63      | 1.462                                                | 1.35-1.59 | <.0001  |
| 50–59                   | 3589/5164 (69.5%)    | 12456.42     | 4465/5164 (86.46%)   | 6371.06      | 1.564                                                | 1.5-1.64  | <.0001  | 3337/4790 (69.67%)   | 11413.99     | 4160/4790 (86.85%)   | 5634.82      | 1.582                                                | 1.51-1.66 | <.0001  | 2862/4066 (70.39%)   | 8981.13      | 3466/4066 (85.24%)   | 5904.56      | 1.336                                                | 1.27-1.41 | <.0001  |
| 60–69                   | 6570/8268 (79.46%)   | 14912        | 7532/8268 (91.1%)    | 8771.89      | 1.32                                                 | 1.28-1.37 | <.0001  | 6078/7619 (79.77%)   | 13608.15     | 6970/7619 (91.48%)   | 7500.58      | 1.372                                                | 1.32-1.42 | <.0001  | 4512/5688 (79.32%)   | 9714.84      | 5077/5688 (89.26%)   | 7322.5       | 1.16                                                 | 1.11-1.21 | <.0001  |
| 70–79                   | 8694/9815 (88.58%)   | 11717.5      | 9142/9815 (93.14%)   | 8284.97      | 1.145                                                | 1.11-1.18 | <.0001  | 6946/7880 (88.15%)   | 9877.55      | 7395/7880 (93.85%)   | 6422.34      | 1.247                                                | 1.21-1.29 | <.0001  | 3763/4281 (87.9%)    | 5371.09      | 3901/4281 (91.12%)   | 4505.1       | 1.052                                                | 1.01-1.1  | 0.0289  |
| Medical aid beneficiary | 1835/2278 (80.55%)   | 3781.87      | 1854/2096 (88.45%)   | 2121.83      | 1.252                                                | 1.17-1.34 | <.0001  | 1598/1985 (80.5%)    | 3400.63      | 1578/1760 (89.66%)   | 1720         | 1.37                                                 | 1.28-1.47 | <.0001  | 988/1281 (77.13%)    | 2317.2       | 963/1113 (86.52%)    | 1384.11      | 1.193                                                | 1.09-1.31 | 0.0001  |
| Medial facility         |                      |              |                      |              |                                                      |           |         |                      |              |                      |              |                                                      |           |         |                      |              |                      |              |                                                      |           |         |
| Senior general hospital | 6424/8676 (74.04%)   | 19188.9      | 7808/8793 (88.8%)    | 9868.65      | 1.42                                                 | 1.37-1.47 | <.0001  | 5827/7903 (73.73%)   | 17497.29     | 7234/8163 (88.62%)   | 9049.45      | 1.409                                                | 1.36-1.46 | <.0001  | 4413/5940 (74.29%)   | 12268.44     | 5313/6014 (88.34%)   | 7337.08      | 1.332                                                | 1.28-1.39 | <.0001  |
| Tertiary hospital       | 2252/2719 (82.82%)   | 4710.36      | 2251/2441 (92.22%)   | 2593.05      | 1.229                                                | 1.16-1.31 | <.0001  | 2039/2460 (82.89%)   | 4231.26      | 2146/2326 (92.26%)   | 2382.87      | 1.252                                                | 1.18-1.33 | <.0001  | 1181/1458 (81%)      | 2661.04      | 1075/1232 (87.26%)   | 1881.72      | 1.065                                                | 0.98-1.16 | 0.1457  |
| Secondary hospital      | 11984/14771 (81.13%) | 24484.13     | 13570/14933 (90.87%) | 15434.66     | 1.301                                                | 1.27-1.33 | <.0001  | 10145/12543 (80.88%) | 21106.72     | 11379/12414 (91.66%) | 11965.97     | 1.418                                                | 1.38-1.46 | <.0001  | 6890/8774 (78.53%)   | 15396.4      | 7829/8930 (87.67%)   | 12335.48     | 1.143                                                | 1.11-1.18 | <.0001  |
| Local clinic            | 4/9 (44.44%)         | 30.11        | 7/8 (87.5%)          | 12.24        | -                                                    | -         | -       | 1/1 (100%)           | 6.76         | 4/4 (100%)           | 0.82         | -                                                    | -         | -       | 4/10 (40%)           | 26.74        | 5/6 (83.33%)         | 11.92        | -                                                    | -         | -       |
| Primary cancer          |                      |              |                      |              |                                                      |           |         |                      |              |                      |              |                                                      |           |         |                      |              |                      |              |                                                      |           |         |
| Head and neck           | 340/501 (67.86%)     | 1301.78      | 386/477 (80.92%)     | 1240.77      | 1.239                                                | 1.06-1.44 | 0.0061  | 309/446 (69.28%)     | 1123.54      | 338/405 (83.46%)     | 905.23       | 1.284                                                | 1.09-1.51 | 0.0024  | 268/400 (67%)        | 1042.39      | 297/371 (80.05%)     | 905.37       | 1.224                                                | 1.03-1.46 | 0.0215  |

| Global Health Metrics Report - Q3 2024 |                 |                      |                    |                      |                            |            |            |                  |                     |                            |                      |                    |                  |                 |                            |                    |                   |                    |                  |                            |            |           |
|----------------------------------------|-----------------|----------------------|--------------------|----------------------|----------------------------|------------|------------|------------------|---------------------|----------------------------|----------------------|--------------------|------------------|-----------------|----------------------------|--------------------|-------------------|--------------------|------------------|----------------------------|------------|-----------|
| Category                               | North America   |                      |                    |                      |                            | Europe     |            |                  |                     |                            | Asia-Pacific         |                    |                  |                 |                            | Latin America      |                   |                    |                  |                            |            |           |
|                                        | Sub-Region      | Population           | Healthcare Spend   | Life Expectancy      | Chronic Disease Prevalence | Sub-Region | Population | Healthcare Spend | Life Expectancy     | Chronic Disease Prevalence | Sub-Region           | Population         | Healthcare Spend | Life Expectancy | Chronic Disease Prevalence | Sub-Region         | Population        | Healthcare Spend   | Life Expectancy  | Chronic Disease Prevalence |            |           |
| Digestive                              | Esophagus       | 251/301 (83.39%)     | 502.29             | 268/290 (92.41%)     | 294.28                     | 1.334      | 1.11-1.6   | 0.002            | 226/273 (82.78%)    | 452.6                      | 240/256 (93.75%)     | 219.38             | 1.473            | 1.22-1.78       | <.0001                     | 181/223 (81.17%)   | 397.38            | 244/273 (89.38%)   | 317.21           | 1.266                      | 1.03-1.55  | 0.024     |
|                                        | Stomach         | 1337/1926 (69.42%)   | 6396.93            | 1454/1579 (92.08%)   | 1691.48                    | 1.83       | 1.69-1.98  | <.0001           | 1174/1684 (69.71%)  | 5586.01                    | 1192/1262 (94.45%)   | 1123.24            | 1.941            | 1.78-2.12       | <.0001                     | 594/780 (76.15%)   | 1882.8            | 502/577 (87%)      | 867.94           | 1.25                       | 1.1-1.42   | 0.0006    |
| Cancer                                 | Colorectal      | 1577/2317 (68.06%)   | 6640.25            | 2063/2316 (89.08%)   | 3039.6                     | 1.769      | 1.65-1.89  | <.0001           | 1402/2050 (68.39%)  | 5820.89                    | 1832/2048 (89.44%)   | 2507.48            | 1.826            | 1.7-1.96        | <.0001                     | 1064/1590 (66.92%) | 4500.96           | 1323/1513 (87.44%) | 2263.01          | 1.623                      | 1.49-1.76  | <.0001    |
|                                        | Liver           | 1449/1718 (84.34%)   | 2534.85            | 1413/1508 (93.7%)    | 1134.74                    | 1.438      | 1.33-1.55  | <.0001           | 1267/1502 (84.35%)  | 2184.19                    | 1245/1314 (94.75%)   | 869.91             | 1.538            | 1.42-1.67       | <.0001                     | 954/1147 (83.17%)  | 1675.3            | 861/935 (92.09%)   | 888.73           | 1.233                      | 1.12-1.35  | <.0001    |
| Respiratory                            | Hepatobiliary   | 347/403 (86.1%)      | 550.53             | 380/399 (95.24%)     | 288.06                     | 1.257      | 1.08-1.47  | 0.0036           | 295/336 (87.8%)     | 457.44                     | 273/282 (96.81%)     | 180.02             | 1.399            | 1.17-1.67       | 0.0002                     | 195/220 (88.64%)   | 269.6             | 177/193 (91.71%)   | 192.22           | 0.927                      | 0.75-1.15  | 0.4982    |
|                                        | Pancreas        | 594/708 (83.9%)      | 1187.5             | 523/593 (88.2%)      | 703.84                     | 1.02       | 0.9-1.15   | 0.745            | 483/572 (84.44%)    | 930.29                     | 438/489 (89.57%)     | 507.55             | 1.148            | 1-1.31          | 0.0452                     | 289/358 (80.73%)   | 636.97            | 248/295 (84.07%)   | 446.45           | 0.938                      | 0.79-1.12  | 0.4747    |
| Cardiovascular                         | Pharynx         | 83/123 (67.48%)      | 408.28             | 109/136 (80.15%)     | 377.46                     | 0.976      | 0.72-1.32  | 0.8761           | 79/114 (69.3%)      | 361.99                     | 90/110 (81.82%)      | 306.04             | 1.007            | 0.73-1.39       | 0.9666                     | 63/97 (64.95%)     | 344.37            | 91/112 (81.25%)    | 309.81           | 1.252                      | 0.87-1.8   | 0.2244    |
|                                        | Lung            | 10976/12976 (84.59%) | 16617.32           | 12764/14056 (90.81%) | 14914.3                    | 1.07       | 1.04-1.1   | <.0001           | 9910/11782 (84.11%) | 15453.05                   | 11879/13053 (91.01%) | 13180.9            | 1.149            | 1.12-1.18       | <.0001                     | 7019/8522 (82.36%) | 11677.71          | 8251/9232 (89.37%) | 11662.81         | 1.022                      | 0.99-1.06  | 0.1762    |
| Oncology                               | Breast          | 950/1767 (53.76%)    | 6919.32            | 1163/1582 (73.51%)   | 3796.85                    | 1.629      | 1.49-1.78  | <.0001           | 902/1696 (53.18%)   | 6745.31                    | 1210/1569 (77.12%)   | 3420.93            | 1.778            | 1.63-1.94       | <.0001                     | 864/1625 (53.17%)  | 6414.35           | 1179/1641 (71.85%) | 4266.31          | 1.619                      | 1.48-1.77  | <.0001    |
|                                        | Cervix          | 103/170 (60.59%)     | 647.15             | 143/169 (84.62%)     | 298.5                      | 1.749      | 1.33-2.3   | <.0001           | 89/150 (59.33%)     | 569.84                     | 126/153 (82.35%)     | 264.19             | 1.947            | 1.45-2.61       | <.0001                     | 147/154 (57.79%)   | 609.95            | 147/183 (80.33%)   | 357.03           | 1.848                      | 1.38-2.47  | <.0001    |
| Reproductive                           | Uterine         | 48/82 (58.54%)       | 298.02             | 72/83 (86.75%)       | 120.97                     | 2.133      | 1.4-3.25   | 0.0004           | 47/78 (60.26%)      | 280.91                     | 70/84 (83.33%)       | 134.02             | 2.185            | 1.42-3.37       | 0.0004                     | 44/74 (59.46%)     | 269.88            | 58/77 (75.32%)     | 137.79           | 1.61                       | 0.99-2.62  | 0.0552    |
|                                        | Ovary           | 248/387 (64.08%)     | 1130.71            | 308/374 (82.35%)     | 659.21                     | 1.649      | 1.38-1.97  | <.0001           | 235/358 (65.64%)    | 1016.73                    | 276/333 (82.88%)     | 567.17             | 1.592            | 1.33-1.91       | <.0001                     | 155/232 (66.81%)   | 625.88            | 141/183 (77.05%)   | 355.39           | 1.54                       | 1.2-1.97   | 0.0006    |
| Urology                                | Prostate        | 680/918 (74.07%)     | 2046.21            | 821/945 (86.88%)     | 1413.92                    | 1.418      | 1.28-1.57  | <.0001           | 573/778 (73.65%)    | 1739.04                    | 680/765 (88.89%)     | 1014.83            | 1.565            | 1.39-1.76       | <.0001                     | 420/564 (74.47%)   | 1187.29           | 538/635 (84.72%)   | 1050.46          | 1.204                      | 1.06-1.37  | 0.0057    |
|                                        | Scrotum         | 11/29 (37.93%)       | 138.18             | 20/30 (66.67%)       | 64.92                      | 4.54       | 1.35-15.26 | 0.0145           | 13/30 (43.33%)      | 148.7                      | 16/22 (72.73%)       | 45.3               | 4.043            | 1.11-14.7       | 0.0339                     | 9/17 (52.94%)      | 59.82             | 12/14 (85.71%)     | 22.58            | 1.687                      | 0.22-13.03 | 0.6163    |
| Endocrine                              | Kidney          | 399/561 (71.12%)     | 1349.96            | 416/482 (86.31%)     | 563.1                      | 1.613      | 1.4-1.86   | <.0001           | 373/528 (70.64%)    | 1298.28                    | 428/491 (87.17%)     | 551.97             | 1.64             | 1.41-1.9        | <.0001                     | 218/298 (73.15%)   | 585.59            | 214/240 (89.17%)   | 283.49           | 1.524                      | 1.25-1.86  | <.0001    |
|                                        | Bladder         | 229/315 (72.7%)      | 703.27             | 286/321 (89.1%)      | 354.61                     | 1.526      | 1.27-1.83  | <.0001           | 205/280 (73.21%)    | 623.45                     | 233/257 (90.66%)     | 244.24             | 1.627            | 1.33-1.99       | <.0001                     | 133/183 (72.68%)   | 395.22            | 148/176 (84.09%)   | 241.56           | 1.203                      | 0.93-1.56  | 0.1617    |
| Immunology                             | Thyroid         | 208/592 (35.14%)     | 2861.08            | 451/579 (77.89%)     | 1280.78                    | 2.733      | 2.3-3.25   | <.0001           | 180/484 (37.19%)    | 2249.78                    | 337/444 (75.9%)      | 988.89             | 2.416            | 2-2.92          | <.0001                     | 131/369 (35.5%)    | 1694.3            | 252/321 (78.5%)    | 701.81           | 3.046                      | 2.42-3.84  | <.0001    |
|                                        | Operation       | 509/712 (71.49%)     | 1205.38            | 541/697 (77.62%)     | 1361.67                    | 0.928      | 0.82-1.05  | 0.2384           | 486/684 (71.05%)    | 1167.3                     | 529/680 (77.79%)     | 1274.25            | 0.931            | 0.82-1.06       | 0.2791                     | 393/559 (70.3%)    | 920.62            | 467/568 (82.22%)   | 946.03           | 1.021                      | 0.89-1.17  | 0.7634    |
| Pharmacology                           | Chemotherapy    | 6999/8689 (80.55%)   | 12684.22           | 7715/8838 (87.29%)   | 10525.82                   | 1.179      | 1.14-1.22  | <.0001           | 6570/8200 (80.12%)  | 12174.64                   | 7342/8450 (86.89%)   | 9997.84            | 1.196            | 1.16-1.24       | <.0001                     | 5487/6938 (79.09%) | 10580.64          | 6582/7518 (87.55%) | 9924.26          | 1.151                      | 1.11-1.19  | <.0001    |
|                                        | Diagnostic year | 2005                 | 1793/2087 (85.91%) | 5083.12              | 1687/1783 (94.62%)         | 2363.36    | 1.32       | 1.23-1.41        | <.0001              | 1339/1580 (84.75%)         | 4216.64              | 1493/1566 (95.34%) | 1855.7           | 1.526           | 1.41-1.65                  | <.0001             | 883/1057 (83.54%) | 2993.15            | 885/957 (92.48%) | 1717.53                    | 1.253      | 1.14-1.38 |
| Epidemiology                           | 2006            | 1915/2509 (76.33%)   | 8464.6             | 2175/2326 (93.51%)   | 3182.52                    | 1.535      | 1.44-1.64  | <.0001           | 1828/2341 (78.09%)  | 7401.23                    | 1838/1951 (94.21%)   | 2523.39            | 1.484            | 1.39-1.59       | <.0001                     | 994/1327 (74.91%)  | 4723.55           | 1026/1132 (90.64%) | 2113.63          | 1.367                      | 1.25-1.5   | <.0001    |
|                                        | 2007            | 1781/2438 (73.05%)   | 8340.51            | 2105/2293 (91.8%)    | 3454.62                    | 1.57       | 1.47-1.68  | <.0001           | 1634/2198 (74.34%)  | 7198.39                    | 1915/2040 (93.87%)   | 2653.81            | 1.57             | 1.47-1.68       | <.0001                     | 880/1236 (71.2%)   | 4413.37           | 963/1112 (86.6%)   | 2457.5           | 1.351                      | 1.23-1.48  | <.0001    |
| Public Health                          | 2008            | 1881/2250 (83.6%)    | 4674.4             | 1949/2074 (93.97%)   | 2439.16                    | 1.305      | 1.22-1.39  | <.0001           | 1647/1994 (82.6%)   | 4386.22                    | 1810/1906 (94.9%)    | 2018.55            | 1.447            | 1.35-1.55       | <.0001                     | 1030/1245 (82.73%) | 2802.68           | 1005/1107 (90.79%) | 1953.85          | 1.066                      | 0.98-1.17  | 0.1573    |
|                                        | 2009            | 1791/2123 (84.36%)   | 3880.06            | 1931/2058 (93.83%)   | 2436.24                    | 1.221      | 1.14-1.3   | <.0001           | 1583/1885 (83.98%)  | 3543.15                    | 1806/1912 (94.46%)   | 2071.62            | 1.305            | 1.22-1.4        | <.0001                     | 931/1119 (83.2%)   | 2312.64           | 983/1088 (90.35%)  | 1835.09          | 1.084                      | 0.99-1.19  | 0.0825    |

|      |                       |         |                       |         |       |               |        |                       |         |                       |         |       |               |        |                       |         |                       |         |       |               |        |
|------|-----------------------|---------|-----------------------|---------|-------|---------------|--------|-----------------------|---------|-----------------------|---------|-------|---------------|--------|-----------------------|---------|-----------------------|---------|-------|---------------|--------|
| 2010 | 1827/2192<br>(83.35%) | 3711.05 | 2023/2191<br>(92.33%) | 2576.7  | 1.206 | 1.13-<br>1.29 | <.0001 | 1648/1965<br>(83.87%) | 3290.45 | 1924/2049<br>(93.9%)  | 2125.46 | 1.302 | 1.22-<br>1.39 | <.0001 | 1105/1341<br>(82.4%)  | 2379.87 | 1167/1275<br>(91.53%) | 1965.45 | 1.065 | 0.98-<br>1.16 | 0.139  |
| 2011 | 1596/1910<br>(83.56%) | 3027.46 | 1919/2069<br>(92.75%) | 2257.95 | 1.247 | 1.17-<br>1.33 | <.0001 | 1434/1714<br>(83.66%) | 2697.33 | 1724/1844<br>(93.49%) | 1876.93 | 1.288 | 1.2-<br>1.38  | <.0001 | 1125/1341<br>(83.89%) | 2144.41 | 1190/1305<br>(91.19%) | 1852.93 | 1.044 | 0.96-<br>1.13 | 0.3053 |
| 2012 | 1626/1959<br>(83%)    | 2659.7  | 1866/2011<br>(92.79%) | 1894.26 | 1.297 | 1.21-<br>1.39 | <.0001 | 1358/1653<br>(82.15%) | 2367.28 | 1606/1731<br>(92.78%) | 1703.51 | 1.356 | 1.26-<br>1.46 | <.0001 | 1191/1456<br>(81.8%)  | 2120.42 | 1402/1528<br>(91.75%) | 1706.63 | 1.157 | 1.07-<br>1.25 | 0.0003 |
| 2013 | 1686/2106<br>(80.06%) | 2660.06 | 2005/2190<br>(91.55%) | 2024.14 | 1.308 | 1.22-<br>1.4  | <.0001 | 1462/1839<br>(79.5%)  | 2392.01 | 1728/1874<br>(92.21%) | 1786.09 | 1.348 | 1.26-<br>1.45 | <.0001 | 1207/1532<br>(78.79%) | 2074.89 | 1511/1666<br>(90.7%)  | 1792.42 | 1.257 | 1.16-<br>1.36 | <.0001 |
| 2014 | 1593/2018<br>(78.94%) | 2232.1  | 2007/2232<br>(89.92%) | 1939.7  | 1.282 | 1.2-<br>1.37  | <.0001 | 1420/1799<br>(78.93%) | 2009.02 | 1681/1884<br>(89.23%) | 1705.55 | 1.293 | 1.2-<br>1.39  | <.0001 | 1065/1399<br>(76.13%) | 1681.13 | 1469/1679<br>(87.49%) | 1659.96 | 1.234 | 1.14-<br>1.34 | <.0001 |
| 2015 | 1556/2098<br>(74.17%) | 1928.28 | 2007/2329<br>(86.17%) | 1715.24 | 1.295 | 1.21-<br>1.38 | <.0001 | 1296/1798<br>(72.08%) | 1777.3  | 1682/1974<br>(85.21%) | 1589.34 | 1.369 | 1.27-<br>1.47 | <.0001 | 1105/1531<br>(72.18%) | 1491.92 | 1410/1677<br>(84.08%) | 1405.68 | 1.244 | 1.15-<br>1.35 | <.0001 |
| 2016 | 1619/2485<br>(65.15%) | 1752.17 | 1962/2619<br>(74.91%) | 1624.7  | 1.304 | 1.22-<br>1.39 | <.0001 | 1363/2141<br>(63.66%) | 1563.01 | 1556/2176<br>(71.51%) | 1489.16 | 1.249 | 1.16-<br>1.35 | <.0001 | 972/1598<br>(60.83%)  | 1214.59 | 1211/1656<br>(73.13%) | 1105.54 | 1.33  | 1.22-<br>1.45 | <.0001 |

Abbreviations : Non-RT: Non-radio therapy, RT: radio therapy, PSM: propensity score matching, HR: Hazard ratio,

**Supplemental Table 5. Characteristics of study subjects according to the RT modality (RT patients with more than 5 fractions RT)**

|                         | Before PSM   |             |                     | P-value | After PSM    |             |         | P-value     | P-value      |                     |             | P-value     |        |
|-------------------------|--------------|-------------|---------------------|---------|--------------|-------------|---------|-------------|--------------|---------------------|-------------|-------------|--------|
|                         | Radiosurgery | WBRT        | Radiosurgery + WBRT |         | Radiosurgery | WBRT        | P-value |             | Radiosurgery | Radiosurgery + WBRT | P-value     |             | WBRT   |
|                         | 7847         | 23899       | 5300                |         | 7642         | 7642        |         | 4823        | 4823         |                     | 5245        | 5245        |        |
| Sex                     |              |             |                     | <.0001  |              |             | 0.6815  |             |              | 0.0007              |             |             | 0.3386 |
| Male                    | 4622         | 12824       | 2650                |         | 4484         | 4459        |         | 2784        | 2619         |                     | 2576        | 2625        |        |
| Female                  | 3225         | 11075       | 2650                |         | 3158         | 3183        |         | 2039        | 2204         |                     | 2669        | 2620        |        |
| Age                     | 61.34±10.92  | 59.28±11.15 | 56.75±10.79         | <.0001  | 61.33±10.89  | 61.30±10.74 | 0.8393  | 58.80±10.78 | 57.52±10.57  | 0.0006              | 57.24±11.19 | 56.80±10.74 | 0.0023 |
| 20–29                   | 30           | 137         | 31                  |         | 27           | 21          |         | 24          | 22           |                     | 52          | 29          |        |
| 30–39                   | 254          | 1086        | 320                 |         | 245          | 254         |         | 210         | 240          |                     | 324         | 310         |        |
| 40–49                   | 906          | 3406        | 958                 |         | 888          | 850         |         | 730         | 806          |                     | 955         | 950         |        |
| 50–59                   | 2000         | 7017        | 1771                |         | 1950         | 1985        |         | 1505        | 1595         |                     | 1616        | 1755        |        |
| 60–69                   | 2581         | 7412        | 1551                |         | 2520         | 2514        |         | 1560        | 1499         |                     | 1544        | 1539        |        |
| 70–79                   | 2076         | 4841        | 669                 |         | 2012         | 2018        |         | 794         | 661          |                     | 754         | 662         |        |
| Medical aid beneficiary | 363          | 1544        | 220                 | <.0001  | 354          | 329         | 0.3277  | 198         | 208          | 0.6121              | 376         | 219         | <.0001 |
| Medial facility         |              |             |                     | <.0001  |              |             | 0.05    |             |              | 0.005               |             |             | 0.0008 |
| Senior general hospital | 4228         | 10241       | 2874                |         | 4110         | 4258        |         | 2675        | 2644         |                     | 2723        | 2841        |        |
| Tertiary hospital       | 903          | 1690        | 423                 |         | 864          | 812         |         | 474         | 396          |                     | 516         | 412         |        |
| Secondary hospital      | 2716         | 11963       | 2003                |         | 2668         | 2572        |         | 1674        | 1783         |                     | 2006        | 1992        |        |
| Local clinic            | 0            | 5           | 0                   |         | 0            | 0           |         |             |              |                     |             |             |        |
| Primary cancer          |              |             |                     |         |              |             |         |             |              |                     |             |             |        |
| Head and neck           | 116          | 542         | 97                  | <.0001  | 116          | 93          | 0.1092  | 93          | 93           | 1                   | 170         | 97          | <.0001 |
| Esophagus               | 55           | 404         | 58                  | <.0001  | 55           | 49          | 0.5549  | 51          | 55           | 0.696               | 83          | 58          | 0.034  |
| Stomach                 | 276          | 703         | 104                 | <.0001  | 272          | 244         | 0.2098  | 132         | 103          | 0.0555              | 184         | 104         | <.0001 |
| Colorectal              | 801          | 2144        | 618                 | <.0001  | 795          | 751         | 0.2379  | 585         | 575          | 0.7543              | 777         | 617         | <.0001 |
| Liver                   | 427          | 1311        | 248                 | 0.0582  | 423          | 395         | 0.3143  | 283         | 238          | 0.0427              | 361         | 248         | <.0001 |
| Hepatobiliary           | 61           | 232         | 21                  | 0.0001  | 61           | 49          | 0.2508  | 32          | 21           | 0.1297              | 43          | 21          | 0.0058 |
| Pancreas                | 121          | 384         | 64                  | 0.1016  | 119          | 92          | 0.0612  | 72          | 61           | 0.3368              | 107         | 64          | 0.0009 |

|                 |           |           |           |        |          |           |        |           |           |        |           |           |        |
|-----------------|-----------|-----------|-----------|--------|----------|-----------|--------|-----------|-----------|--------|-----------|-----------|--------|
| Pharynx         | 29        | 182       | 21        | <.0001 | 29       | 33        | 0.6107 | 19        | 20        | 0.8725 | 28        | 21        | 0.3162 |
| Lung            | 5371      | 12599     | 3227      | <.0001 | 5341     | 5525      | 0.001  | 3220      | 3182      | 0.4128 | 2784      | 3222      | <.0001 |
| Breast          | 605       | 4672      | 1186      | <.0001 | 605      | 642       | 0.2743 | 591       | 779       | <.0001 | 1200      | 1186      | 0.7444 |
| Cervix          | 51        | 491       | 73        | <.0001 | 51       | 42        | 0.3492 | 46        | 60        | 0.1715 | 126       | 73        | 0.0001 |
| Uterine         | 29        | 167       | 39        | 0.0038 | 29       | 28        | 0.8944 | 27        | 30        | 0.6902 | 61        | 39        | 0.0271 |
| Ovary           | 140       | 254       | 67        | <.0001 | 138      | 116       | 0.1639 | 68        | 62        | 0.5962 | 98        | 67        | 0.015  |
| Prostate        | 155       | 742       | 114       | <.0001 | 154      | 131       | 0.169  | 113       | 112       | 0.9462 | 176       | 114       | 0.0002 |
| Scrotum         | 10        | 19        | 6         | 0.4343 | 10       | 9         | 0.8184 | 8         | 6         | 0.5927 | 8         | 6         | 0.5927 |
| Kidney          | 439       | 299       | 148       | <.0001 | 394      | 273       | <.0001 | 216       | 148       | 0.0003 | 169       | 141       | 0.1065 |
| Bladder         | 82        | 212       | 28        | 0.0066 | 78       | 74        | 0.7444 | 36        | 27        | 0.2553 | 45        | 28        | 0.0459 |
| Thyroid         | 170       | 456       | 126       | 0.0568 | 168      | 155       | 0.4647 | 108       | 111       | 0.8375 | 183       | 126       | 0.001  |
| Operation       | 756       | 1072      | 743       | <.0001 | 715      | 647       | 0.0535 | 601       | 638       | 0.2602 | 599       | 736       | <.0001 |
| Chemotherapy    | 4388      | 13296     | 3639      | <.0001 | 4293     | 4382      | 0.1462 | 3070      | 3207      | 0.0034 | 3219      | 3604      | <.0001 |
| Diagnostic year |           |           |           | <.0001 |          |           | 0.998  |           |           | 0.1683 |           |           | <.0001 |
| 2005            | 299       | 1366      | 139       |        | 288      | 285       |        | 159       | 131       |        | 156       | 135       |        |
| 2006            | 416       | 1586      | 189       |        | 406      | 433       |        | 203       | 184       |        | 279       | 185       |        |
| 2007            | 474       | 1603      | 220       |        | 462      | 455       |        | 245       | 215       |        | 241       | 216       |        |
| 2008            | 604       | 1592      | 280       |        | 591      | 593       |        | 304       | 275       |        | 396       | 276       |        |
| 2009            | 695       | 1668      | 391       |        | 677      | 677       |        | 394       | 378       |        | 404       | 385       |        |
| 2010            | 755       | 1911      | 422       |        | 721      | 696       |        | 403       | 406       |        | 426       | 419       |        |
| 2011            | 754       | 2031      | 495       |        | 730      | 714       |        | 472       | 458       |        | 599       | 493       |        |
| 2012            | 606       | 2392      | 554       |        | 596      | 588       |        | 478       | 476       |        | 473       | 550       |        |
| 2013            | 715       | 2524      | 620       |        | 688      | 713       |        | 477       | 542       |        | 600       | 614       |        |
| 2014            | 773       | 2574      | 658       |        | 759      | 768       |        | 516       | 578       |        | 498       | 655       |        |
| 2015            | 803       | 2485      | 722       |        | 789      | 784       |        | 610       | 610       |        | 629       | 714       |        |
| 2016            | 953       | 2167      | 610       |        | 935      | 936       |        | 562       | 570       |        | 544       | 603       |        |
| CCI             | 5.21±2.06 | 4.78±2.15 | 2.09±1.91 | <.0001 | 5.2±2.05 | 5.23±2.13 | 0.4294 | 5.16±2.09 | 5.11±1.94 | 0.1874 | 5.12±2.29 | 5.09±1.91 | 0.3872 |

Abbreviations : RT: radio therapy, PSM: propensity score matching, CCI: Charlson Comorbidity Index, WBRT, whole-brain radiotherapy



Note that all variables showed statistically significant differences at a p-value of 1%. In addition, all variables except sex differed in the probabilistic approach using a Bayesian factor.

**Supplemental Table 6. Before PSM, characteristics of study subjects according to the RT modality (RT patients with at least one fraction RT)**

|                         | Radiosurgery |       | WBRT        |       | Radiosurgery + WBRT |       | P-value |
|-------------------------|--------------|-------|-------------|-------|---------------------|-------|---------|
|                         | N            | %     | N           | %     | N                   | %     |         |
|                         | 5276         |       | 42187       |       | 7871                |       |         |
| Sex                     |              |       |             |       |                     |       |         |
| Male                    | 3157         | 59.84 | 24003       | 56.9  | 4115                | 52.28 | <.0001  |
| Female                  | 2119         | 40.16 | 18184       | 43.1  | 3756                | 47.72 |         |
| Age                     | 62.61±10.76  |       | 60.49±11.11 |       | 57.40±10.82         |       | <.0001  |
| 20~29                   | 18           | 0.34  | 218         | 0.52  | 43                  | 0.55  | <.0001  |
| 30~39                   | 142          | 2.69  | 1585        | 3.76  | 432                 | 5.49  |         |
| 40~49                   | 504          | 9.55  | 5315        | 12.6  | 1360                | 17.28 |         |
| 50~59                   | 1234         | 23.39 | 11411       | 27.05 | 2537                | 32.23 |         |
| 60~69                   | 1773         | 33.61 | 13576       | 32.18 | 2359                | 29.97 |         |
| 70~79                   | 1605         | 30.42 | 10082       | 23.9  | 1140                | 14.48 |         |
| Medical aid beneficiary | 231          | 4.38  | 2941        | 6.97  | 352                 | 4.47  | <.0001  |
| Medial facility         |              |       |             |       |                     |       |         |
| Senior general hospital | 2941         | 55.74 | 16553       | 39.24 | 4112                | 52.24 | <.0001  |
| Tertiary hospital       | 624          | 11.83 | 3425        | 8.12  | 698                 | 8.87  |         |
| Secondary hospital      | 1711         | 32.43 | 22205       | 52.63 | 3061                | 38.89 |         |
| Local clinic            |              |       | 4           | 0.01  |                     |       |         |
| Primary cancer          |              |       |             |       |                     |       |         |
| Head and neck           | 71           | 1.35  | 856         | 2.03  | 142                 | 1.8   | 0.0021  |
| Esophagus               | 40           | 0.76  | 605         | 1.43  | 73                  | 0.93  | <.0001  |
| Stomach                 | 205          | 3.89  | 1586        | 3.76  | 175                 | 2.22  | <.0001  |
| Colorectal              | 572          | 10.84 | 3436        | 8.14  | 847                 | 10.76 | <.0001  |
| Liver                   | 277          | 5.25  | 2235        | 5.3   | 398                 | 5.06  | 0.6784  |
| Hepatobiliary           | 46           | 0.87  | 429         | 1.02  | 36                  | 0.46  | <.0001  |
| Pancreas                | 90           | 1.71  | 729         | 1.73  | 95                  | 1.21  | 0.0037  |
| Pharynx                 | 17           | 0.32  | 259         | 0.61  | 33                  | 0.42  | 0.0056  |
| Lung                    | 3636         | 68.92 | 23309       | 55.25 | 4962                | 63.04 | <.0001  |

|                 |           |       |           |       |          |       |        |
|-----------------|-----------|-------|-----------|-------|----------|-------|--------|
| Breast          | 303       | 5.74  | 6250      | 14.81 | 1488     | 18.9  | <.0001 |
| Cervix          | 28        | 0.53  | 627       | 1.49  | 96       | 1.22  | <.0001 |
| Uterine         | 18        | 0.34  | 238       | 0.56  | 50       | 0.64  | 0.0683 |
| Ovary           | 98        | 1.86  | 463       | 1.1   | 109      | 1.38  | <.0001 |
| Prostate        | 112       | 2.12  | 1285      | 3.05  | 157      | 1.99  | <.0001 |
| Scrotum         | 7         | 0.13  | 38        | 0.09  | 9        | 0.11  | 0.5663 |
| Kidney          | 315       | 5.97  | 629       | 1.49  | 272      | 3.46  | <.0001 |
| Bladder         | 58        | 1.1   | 388       | 0.92  | 52       | 0.66  | 0.0225 |
| Thyroid         | 115       | 2.18  | 675       | 1.6   | 181      | 2.3   | <.0001 |
| Operation       | 473       | 8.97  | 1555      | 3.69  | 1026     | 13.04 | <.0001 |
| Chemotherapy    | 2845      | 53.92 | 21305     | 50.5  | 5182     | 65.84 | <.0001 |
| Diagnostic year |           |       |           |       |          |       |        |
| 2005            | 177       | 3.35  | 2887      | 6.84  | 261      | 3.32  | <.0001 |
| 2006            | 244       | 4.62  | 3287      | 7.79  | 361      | 4.59  |        |
| 2007            | 263       | 4.98  | 3371      | 7.99  | 431      | 5.48  |        |
| 2008            | 349       | 6.61  | 3367      | 7.98  | 535      | 6.8   |        |
| 2009            | 416       | 7.88  | 3408      | 8.08  | 670      | 8.51  |        |
| 2010            | 447       | 8.47  | 3689      | 8.74  | 730      | 9.27  |        |
| 2011            | 470       | 8.91  | 3600      | 8.53  | 779      | 9.9   |        |
| 2012            | 415       | 7.87  | 3689      | 8.74  | 745      | 9.47  |        |
| 2013            | 510       | 9.67  | 3800      | 9.01  | 825      | 10.48 |        |
| 2014            | 575       | 10.9  | 3878      | 9.19  | 856      | 10.88 |        |
| 2015            | 625       | 11.85 | 3765      | 8.92  | 900      | 11.43 |        |
| 2016            | 785       | 14.88 | 3446      | 8.17  | 778      | 9.88  |        |
| CCI             | 5.11±2.19 |       | 4.31±2.50 |       | 5.08±2.0 |       | <.0001 |

Abbreviations : RT: radio therapy, PSM: propensity score matching, CCI: Charlson Comorbidity Index, WBRT, whole-brain radiotherapy

**Supplemental Table 7. After PSM, characteristics of study subjects according to the RT modality (RT patients with at least one fraction RT)**

|                         | Radiosurgery |       |             |       |              | P-value    | Radiosurgery + WBRT |            |       |        |                     | P-value     |         |       |        |
|-------------------------|--------------|-------|-------------|-------|--------------|------------|---------------------|------------|-------|--------|---------------------|-------------|---------|-------|--------|
|                         | Radiosurgery |       | WBRT        |       | Radiosurgery |            | Radiosurgery + WBRT |            | WBRT  |        | Radiosurgery + WBRT |             | P-value |       |        |
|                         | N            | %     | N           | %     | N            |            | %                   | N          | %     | N      | %                   |             |         | N     | %      |
|                         | 5158         |       | 5158        |       |              | 4355       |                     | 4355       |       |        | 7655                |             | 7655    |       |        |
| Sex                     |              |       |             |       | 1            |            |                     |            |       |        |                     |             |         |       |        |
| Male                    | 3090         | 59.91 | 3090        | 59.91 |              | 2650       | 60.85               | 2650       | 60.85 | 1      | 4007                | 52.34       | 4007    | 52.34 | 1      |
| Female                  | 2068         | 40.09 | 2068        | 40.09 |              | 1705       | 39.15               | 1705       | 39.15 |        | 3648                | 47.66       | 3648    | 47.66 |        |
| Age                     | 62.88±10.49  |       | 62.88±10.49 |       | 1            | 61.49±9.87 |                     | 61.49±9.87 |       | 1      | 57.67±10.63         | 57.67±10.63 |         | 1     |        |
| 20~29                   | 8            | 0.16  | 8           | 0.16  |              | 3          | 0.07                | 3          | 0.07  | 1      | 26                  | 0.34        | 26      | 0.34  | 1      |
| 30~39                   | 122          | 2.37  | 122         | 2.37  |              | 96         | 2.2                 | 96         | 2.2   |        | 389                 | 5.08        | 389     | 5.08  |        |
| 40~49                   | 479          | 9.29  | 479         | 9.29  |              | 460        | 10.56               | 460        | 10.56 |        | 1307                | 17.07       | 1307    | 17.07 |        |
| 50~59                   | 1204         | 23.34 | 1204        | 23.34 |              | 1172       | 26.91               | 1172       | 26.91 |        | 2466                | 32.21       | 2466    | 32.21 |        |
| 60~69                   | 1755         | 34.02 | 1755        | 34.02 |              | 1596       | 36.65               | 1596       | 36.65 |        | 2342                | 30.59       | 2342    | 30.59 |        |
| 70~79                   | 1590         | 30.83 | 1590        | 30.83 |              | 1028       | 23.61               | 1028       | 23.61 |        | 1125                | 14.7        | 1125    | 14.7  |        |
| Medical aid beneficiary | 228          | 4.42  | 216         | 4.19  | 0.5605       | 186        | 4.27                | 173        | 3.97  | 0.4835 | 444                 | 5.8         | 345     | 4.51  | 0.0003 |
| Medial facility         |              |       |             |       |              |            |                     |            |       |        |                     |             |         |       |        |
| Senior general hospital | 2843         | 55.12 | 2869        | 55.62 | 0.8711       | 2490       | 57.18               | 2407       | 55.27 | 0.0023 | 3741                | 48.87       | 4032    | 52.67 | <.0001 |
| Tertiary hospital       | 614          | 11.9  | 604         | 11.71 |              | 482        | 11.07               | 423        | 9.71  |        | 819                 | 10.7        | 686     | 8.96  |        |
| Secondary hospital      | 1701         | 32.98 | 1685        | 32.67 |              | 1383       | 31.76               | 1525       | 35.02 |        | 3095                | 40.43       | 2937    | 38.37 |        |
| Local clinic            |              |       |             |       |              |            |                     |            |       |        |                     |             |         |       |        |
| Primary cancer          |              |       |             |       |              |            |                     |            |       |        |                     |             |         |       |        |
| Head and neck           | 70           | 1.36  | 53          | 1.03  | 0.1231       | 63         | 1.45                | 54         | 1.24  | 0.4022 | 186                 | 2.43        | 139     | 1.82  | 0.0084 |
| Esophagus               | 40           | 0.78  | 24          | 0.47  | 0.0448       | 35         | 0.8                 | 38         | 0.87  | 0.7244 | 87                  | 1.14        | 73      | 0.95  | 0.2659 |
| Stomach                 | 202          | 3.92  | 173         | 3.35  | 0.1271       | 148        | 3.4                 | 123        | 2.82  | 0.1229 | 204                 | 2.66        | 174     | 2.27  | 0.1182 |
| Colorectal              | 558          | 10.82 | 523         | 10.14 | 0.2605       | 472        | 10.84               | 491        | 11.27 | 0.5162 | 775                 | 10.12       | 810     | 10.58 | 0.3531 |
| Liver                   | 272          | 5.27  | 238         | 4.61  | 0.1225       | 237        | 5.44                | 222        | 5.1   | 0.4719 | 477                 | 6.23        | 389     | 5.08  | 0.0021 |
| Hepatobiliary           | 45           | 0.87  | 40          | 0.78  | 0.586        | 28         | 0.64                | 30         | 0.69  | 0.7922 | 54                  | 0.71        | 36      | 0.47  | 0.057  |
| Pancreas                | 90           | 1.74  | 74          | 1.43  | 0.2079       | 60         | 1.38                | 57         | 1.31  | 0.7801 | 109                 | 1.42        | 94      | 1.23  | 0.2892 |
| Pharynx                 | 17           | 0.33  | 11          | 0.21  | 0.2562       | 13         | 0.3                 | 20         | 0.46  | 0.2221 | 34                  | 0.44        | 32      | 0.42  | 0.8051 |
| Lung                    | 3585         | 69.5  | 3710        | 71.93 | 0.0068       | 3026       | 69.48               | 3153       | 72.4  | 0.0027 | 4491                | 58.67       | 4838    | 63.2  | <.0001 |

|                 |           |       |           |       |        |           |       |           |       |        |           |       |           |       |        |  |
|-----------------|-----------|-------|-----------|-------|--------|-----------|-------|-----------|-------|--------|-----------|-------|-----------|-------|--------|--|
| Breast          | 302       | 5.85  | 335       | 6.49  | 0.1771 | 276       | 6.34  | 274       | 6.29  | 0.9298 | 1600      | 20.9  | 1426      | 18.63 | 0.0004 |  |
| Cervix          | 28        | 0.54  | 23        | 0.45  | 0.4828 | 22        | 0.51  | 30        | 0.69  | 0.2658 | 113       | 1.48  | 94        | 1.23  | 0.1836 |  |
| Uterine         | 17        | 0.33  | 14        | 0.27  | 0.5895 | 18        | 0.41  | 21        | 0.48  | 0.6302 | 60        | 0.78  | 50        | 0.65  | 0.3386 |  |
| Ovary           | 92        | 1.78  | 79        | 1.53  | 0.3161 | 69        | 1.58  | 66        | 1.52  | 0.7947 | 94        | 1.23  | 106       | 1.38  | 0.393  |  |
| Prostate        | 112       | 2.17  | 98        | 1.9   | 0.329  | 96        | 2.2   | 101       | 2.32  | 0.7186 | 170       | 2.22  | 156       | 2.04  | 0.4332 |  |
| Scrotum         | 4         | 0.08  | 4         | 0.08  | 1      | 2         | 0.05  | 1         | 0.02  | 0.5636 | 3         | 0.04  | 6         | 0.08  | 0.3172 |  |
| Kidney          | 255       | 4.94  | 198       | 3.84  | 0.0062 | 250       | 5.74  | 191       | 4.39  | 0.0039 | 208       | 2.72  | 240       | 3.14  | 0.1249 |  |
| Bladder         | 57        | 1.11  | 37        | 0.72  | 0.0382 | 42        | 0.96  | 39        | 0.9   | 0.7377 | 61        | 0.8   | 50        | 0.65  | 0.2947 |  |
| Thyroid         | 111       | 2.15  | 105       | 2.04  | 0.6799 | 99        | 2.27  | 99        | 2.27  | 1      | 147       | 1.92  | 173       | 2.26  | 0.1419 |  |
| Operation       | 412       | 7.99  | 394       | 7.64  | 0.509  | 428       | 9.83  | 377       | 8.66  | 0.0592 | 585       | 7.64  | 848       | 11.08 | <.0001 |  |
| Chemotherapy    | 2763      | 53.57 | 2787      | 54.03 | 0.6355 | 2444      | 56.12 | 2492      | 57.22 | 0.2993 | 4766      | 62.26 | 4992      | 65.21 | 0.0001 |  |
| Diagnostic year |           |       |           |       |        |           |       |           |       |        |           |       |           |       |        |  |
| 2005            | 177       | 3.43  | 164       | 3.18  | 0.5496 | 156       | 3.58  | 140       | 3.21  | 0.8491 | 331       | 4.32  | 258       | 3.37  | <.0001 |  |
| 2006            | 242       | 4.69  | 248       | 4.81  |        | 206       | 4.73  | 196       | 4.5   |        | 472       | 6.17  | 359       | 4.69  |        |  |
| 2007            | 262       | 5.08  | 244       | 4.73  |        | 225       | 5.17  | 212       | 4.87  |        | 496       | 6.48  | 426       | 5.56  |        |  |
| 2008            | 346       | 6.71  | 347       | 6.73  |        | 313       | 7.19  | 287       | 6.59  |        | 603       | 7.88  | 527       | 6.88  |        |  |
| 2009            | 410       | 7.95  | 391       | 7.58  |        | 370       | 8.5   | 372       | 8.54  |        | 748       | 9.77  | 651       | 8.5   |        |  |
| 2010            | 438       | 8.49  | 459       | 8.9   |        | 382       | 8.77  | 382       | 8.77  |        | 628       | 8.2   | 703       | 9.18  |        |  |
| 2011            | 463       | 8.98  | 441       | 8.55  |        | 382       | 8.77  | 400       | 9.18  |        | 631       | 8.24  | 752       | 9.82  |        |  |
| 2012            | 413       | 8.01  | 392       | 7.6   |        | 366       | 8.4   | 395       | 9.07  |        | 633       | 8.27  | 730       | 9.54  |        |  |
| 2013            | 504       | 9.77  | 480       | 9.31  |        | 416       | 9.55  | 450       | 10.33 |        | 731       | 9.55  | 796       | 10.4  |        |  |
| 2014            | 560       | 10.86 | 543       | 10.53 |        | 494       | 11.34 | 500       | 11.48 |        | 695       | 9.08  | 829       | 10.83 |        |  |
| 2015            | 602       | 11.67 | 685       | 13.28 |        | 506       | 11.62 | 511       | 11.73 |        | 928       | 12.12 | 864       | 11.29 |        |  |
| 2016            | 741       | 14.37 | 764       | 14.81 |        | 539       | 12.38 | 510       | 11.71 |        | 759       | 9.92  | 760       | 9.93  |        |  |
| CCI             | 5.10±2.18 |       | 5.06±2.39 |       | 0.438  | 5.10±2.14 |       | 5.19±2.07 |       | 0.0318 | 4.09±2.35 |       | 5.07±1.99 |       | <.0001 |  |

Abbreviations : RT: radio therapy, PSM: propensity score matching, CCI: Charlson Comorbidity Index, WBRT, whole-brain radiotherapy

### A. Breast cancer

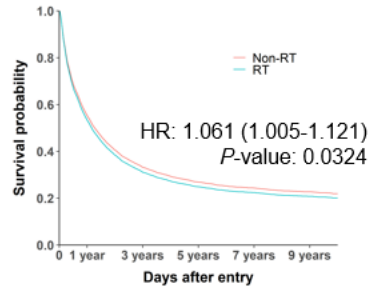

|        |      |      |      |     |     |
|--------|------|------|------|-----|-----|
| RT     | 1733 | 1009 | 806  | 724 | 673 |
| Non-RT | 2156 | 1294 | 1045 | 945 | 882 |

### B. Liver cancer

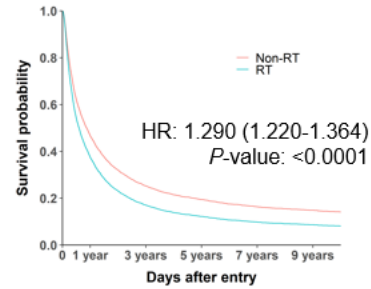

|        |      |     |     |     |     |
|--------|------|-----|-----|-----|-----|
| RT     | 1162 | 528 | 377 | 302 | 266 |
| Non-RT | 1313 | 724 | 557 | 468 | 424 |

### C. Colorectal cancer

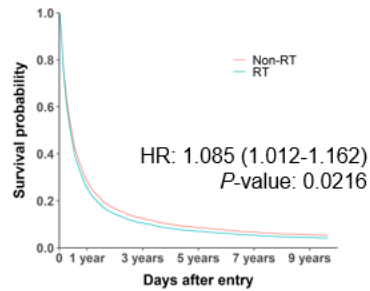

|        |     |     |     |     |    |
|--------|-----|-----|-----|-----|----|
| RT     | 461 | 189 | 124 | 95  | 77 |
| Non-RT | 506 | 222 | 150 | 117 | 97 |

### D. Stomach cancer

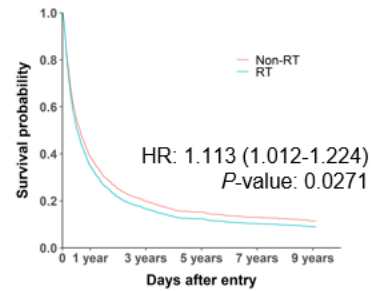

|        |     |     |     |     |     |
|--------|-----|-----|-----|-----|-----|
| RT     | 371 | 174 | 129 | 108 | 93  |
| Non-RT | 377 | 190 | 145 | 124 | 109 |

**Supplemental figure 1.** Cox regression survival analyses for breast cancer (A), liver cancer (B), colorectal cancer (C), and stomach cancer (D). HR: hazard ratio.

Abbreviations : Non-RT: Non-radio therapy, RT: radio therapy, HR: Hazard ratio,

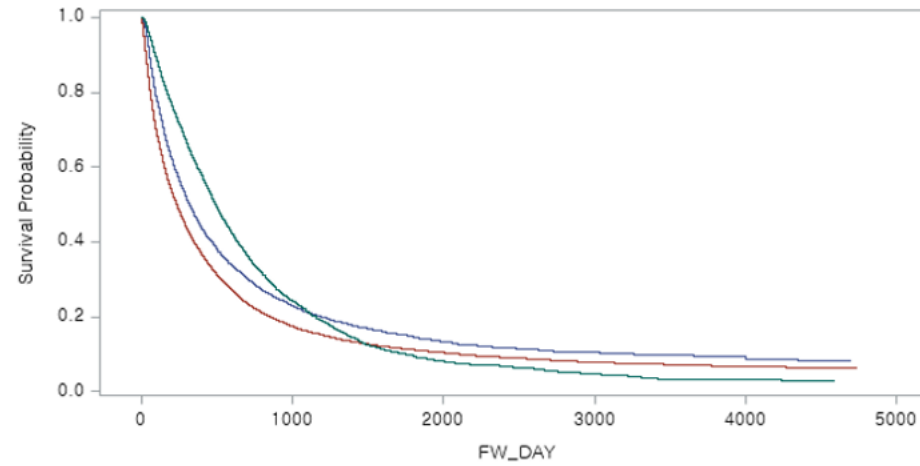

|                              | Start | 1year | 3years | 5years | 7years | 9years |
|------------------------------|-------|-------|--------|--------|--------|--------|
| <b>0 Radiosurgery</b>        | 5276  | 2392  | 710    | 316    | 156    | 67     |
| <b>1 WBRT</b>                | 42186 | 12954 | 4116   | 2269   | 1450   | 962    |
| <b>2 Radiosurgery + WBRT</b> | 7871  | 4322  | 1136   | 369    | 153    | 46     |

**Supplemental figure 2.** Kaplan-Meier survival curves for Radiosurgery, WBRT, Radiosurgery+WBRT.

Abbreviations :WBRT: whole-brain radiotherapy

## References

1. Charlson ME, Pompei P, Ales KL and MacKenzie CR. A new method of classifying prognostic comorbidity in longitudinal studies: development and validation. *Journal of chronic diseases*. 1987;40:373-83.
